# Supplementary material for: Characterization and Analysis of the Full-Length Transcriptome Provide Insights into Fruit Quality Formation in Kiwifruit Cultivar Actinidia arguta cv. Qinziyu
Source: MDPI journal article supplement (doi:10.3390/agronomy13010143), 2023-01-01
Supplement: s1 [file s1]

## Supporting information

### Supporting Tables (five Tables, Tables S1–S5)

### Supporting Figures (four Figures, Figures S1–S4)

#### Supporting Tables

Table S1. Characteristics of 12 primers used for qRT-PCR analysis.

Table S2. Summary of SSR results in *A. arguta* cv. Qinziyu.

Table S3. Annotated transcripts numbers based on eight databases in *A. arguta* cv. Qinziyu.

Table S4. Annotated transcripts in the carbohydrate metabolism and amino acid metabolism pathways.

Table S5. Details of *AabHLH* gene family in *A. arguta* cv. Qinziyu.

#### Supporting Figures

Figure S1. Length distributions of circular consensus (CCS) reads.

Figure S2. Statistics of BUSCO integrity assessment.

Figure S3. Venn diagram of long non-coding RNAs (lncRNAs). CPC: coding potential calculator; CNCI: coding-noncoding index; CPAT: coding potential assessment tool; Pfam: protein families.

Figure S4. eggNOG classification of the assembled full-length transcripts in *A. arguta* cv. Qinziyu.

Table S1. Characteristics of 12 primers used for qRT-PCR analysis.

| Transcript_id         | Forward                       | Reverse                      | Gene name | Enzymes                                  |
|-----------------------|-------------------------------|------------------------------|-----------|------------------------------------------|
| dazi_transcript_3491  | F: GCAGTGAAGAAGGGAGACACCATC   | R: CGTCATCTACCTCCAGCCAAACAG  | PK        | pyruvate kinase                          |
| dazi_transcript_14608 | F: AGCTTGTTGCGATGACTATCCTCTG  | R: TTAAGCCTACTCTTTCGGGAACAGC | MDH       | malate dehydrogenase                     |
| dazi_transcript_62211 | F: CGGAGCCGAATACATTGTGGAGTC   | R: CCTTCTTCGCACCACCCTTCAAG   | GAPD      | glyceraldehyde 3-phosphate dehydrogenase |
| dazi_transcript_4206  | F: AGGTGGCTTTGCTCCTAACATTTCAG | R: CGAGGCGGCAACATCCATTCC     | ENO       | enolase                                  |
| dazi_transcript_1017  | F: TTCTTGGTGGCAGTGCTGATCTTG   | R: CCTGAGGTACGTTCTTCTGGTGTG  | TKT       | transketolase                            |
| dazi_transcript_37294 | F: TCTGACCTCCGATCCATCTTCTCTG  | R: CCGACATTGTTAGTGGGCTGTGAG  | HK        | hexokinase                               |
| dazi_transcript_38033 | F: CCAGTATCAGCGACATTGTGGACAG  | R: ATGCGTACCATTTCCTCCCAACAC  | PFK1      | 6-phosphofructokinase 1                  |
| dazi_transcript_46018 | F: ATAGCGTGTTGGCACTGATTCC     | R: CCACACCAGGCAACACCATACTC   | ACON      | aconitate hydratase                      |
| dazi_transcript_36237 | F: AGAGGAGTGTGGGTGATCTGAAGG   | R: GCTGCTCGGATTCTGGTGTCATC   | PGK       | phosphoglycerate kinase                  |
| dazi_transcript_3928  | F: GCCGAAGAGTGTGACTATGGAATGG  | R: CAAGCCCTTTCACCACGGACTC    | CS        | citrate synthase                         |
| dazi_transcript_4056  | F: TCGTCCGATTCAATGGCTTCTTCTC  | R: ATTTACCACGGACAGCATACTCAC  | ALT       | alanine transaminase                     |
| dazi_transcript_45611 | F: AAAGTCACTCGCTTCCCAAGTCAG   | R: AGGTGGATCTGGAGGTACATCTGC  | GPI       | glucose-6-phosphate isomerase            |

Table S2. Summary of SSR results in *A. arguta* cv. Qinziyu.

| Search item                                    | Numbers    |
|------------------------------------------------|------------|
| Total number of sequences examined             | 35,654     |
| Total size of examined sequences (bp)          | 71,532,931 |
| Total number of identified SSRs                | 27,717     |
| Number of SSR-containing sequences             | 17,932     |
| Number of sequences containing more than 1 SSR | 6,485      |
| Number of SSRs present in compound formation   | 3,713      |
| Mononucleotide                                 | 5,948      |
| Dinucleotide                                   | 17,509     |
| Trinucleotide                                  | 3,299      |
| Tetranucleotide                                | 356        |
| Hexanucleotide                                 | 141        |
| Pentanucleotide                                | 464        |

Table S3. Annotated transcripts numbers based on eight databases in *A. arguta* cv. Qinziyu.

| Annotated database | Annotated number | 300 <= length < 1000 | length >= 1000 |
|--------------------|------------------|----------------------|----------------|
| COG                | 18,257           | 2955                 | 15264          |
| GO                 | 34,444           | 7764                 | 26447          |
| KEGG               | 22,522           | 5151                 | 17149          |
| KOG                | 28,850           | 6018                 | 22634          |
| Pfam               | 36,258           | 6717                 | 29476          |
| Swissprot          | 33,927           | 7159                 | 26507          |
| eggNOG             | 45,049           | 10141                | 34560          |
| NR                 | 45,762           | 10477                | 34881          |
| All annotated      | 45,923           | 10569                | 34925          |

NR: NCBI non-redundant protein sequences; Pfam: Protein family; Swiss-Prot: Swiss-Prot protein sequence database; COG: Clusters of Orthologous Groups; KOG: euKaryotic Ortholog Groups; eggNOG: Clusters of Orthologous Groups of proteins; GO: Gene Ontology; KEGG: Kyoto Encyclopedia of Genes and Genomes.

Table S4. Annotated transcripts in the carbohydrate metabolism and amino acids metabolism pathways.

| KEGG_id | Transcript_id         | Enzyme                             | NR annotation                               |
|---------|-----------------------|------------------------------------|---------------------------------------------|
| K00025  | dazi_transcript_40280 | malate dehydrogenase [EC:1.1.1.37] | malate dehydrogenase                        |
| K00025  | dazi_transcript_44592 | malate dehydrogenase [EC:1.1.1.37] | malate dehydrogenase                        |
| K00025  | dazi_transcript_50012 | malate dehydrogenase [EC:1.1.1.37] | malate dehydrogenase                        |
| K00025  | dazi_transcript_57810 | malate dehydrogenase [EC:1.1.1.37] | malate dehydrogenase, cytoplasmic 2         |
| K00025  | dazi_transcript_6772  | malate dehydrogenase [EC:1.1.1.37] | malate dehydrogenase                        |
| K00025  | dazi_transcript_7221  | malate dehydrogenase [EC:1.1.1.37] | malate dehydrogenase                        |
| K00025  | dazi_transcript_7313  | malate dehydrogenase [EC:1.1.1.37] | malate dehydrogenase, cytoplasmic 2         |
| K00025  | dazi_transcript_7641  | malate dehydrogenase [EC:1.1.1.37] | malate dehydrogenase                        |
| K00025  | dazi_transcript_7743  | malate dehydrogenase [EC:1.1.1.37] | malate dehydrogenase                        |
| K00025  | dazi_transcript_7934  | malate dehydrogenase [EC:1.1.1.37] | malate dehydrogenase                        |
| K00026  | dazi_transcript_10166 | malate dehydrogenase [EC:1.1.1.37] | MDHG; malate dehydrogenase, glyoxysomal     |
| K00026  | dazi_transcript_12595 | malate dehydrogenase [EC:1.1.1.37] | hypothetical protein                        |
| K00026  | dazi_transcript_36242 | malate dehydrogenase [EC:1.1.1.37] | malate dehydrogenase, mitochondrial-like    |
| K00026  | dazi_transcript_38143 | malate dehydrogenase [EC:1.1.1.37] | Lactate/malate dehydrogenase family protein |
| K00026  | dazi_transcript_38322 | malate dehydrogenase [EC:1.1.1.37] | malate dehydrogenase, chloroplastic-like    |
| K00026  | dazi_transcript_40186 | malate dehydrogenase [EC:1.1.1.37] | malate dehydrogenase, mitochondrial-like    |
| K00026  | dazi_transcript_4084  | malate dehydrogenase [EC:1.1.1.37] | malate dehydrogenase, mitochondrial-like    |
| K00026  | dazi_transcript_14608 | malate dehydrogenase [EC:1.1.1.37] | malate dehydrogenase, mitochondrial         |
| K00026  | dazi_transcript_49858 | malate dehydrogenase [EC:1.1.1.37] | malate dehydrogenase, mitochondrial-like    |
| K00026  | dazi_transcript_5103  | malate dehydrogenase [EC:1.1.1.37] | malate dehydrogenase, chloroplastic         |
| K00026  | dazi_transcript_5139  | malate dehydrogenase [EC:1.1.1.37] | malate dehydrogenase, chloroplastic         |
| K00026  | dazi_transcript_51666 | malate dehydrogenase [EC:1.1.1.37] | malate dehydrogenase, glyoxysomal           |
| K00026  | dazi_transcript_5257  | malate dehydrogenase [EC:1.1.1.37] | malate dehydrogenase, chloroplastic         |
| K00026  | dazi_transcript_56939 | malate dehydrogenase [EC:1.1.1.37] | malate dehydrogenase, glyoxysomal           |
| K00026  | dazi_transcript_58798 | malate dehydrogenase [EC:1.1.1.37] | malate dehydrogenase, mitochondrial         |
| K00026  | dazi_transcript_5885  | malate dehydrogenase [EC:1.1.1.37] | malate dehydrogenase, chloroplastic         |
| K00026  | dazi_transcript_62317 | malate dehydrogenase [EC:1.1.1.37] | malate dehydrogenase, glyoxysomal           |
| K00026  | dazi_transcript_62776 | malate dehydrogenase [EC:1.1.1.37] | malate dehydrogenase, mitochondrial-like    |
| K00026  | dazi_transcript_66819 | malate dehydrogenase [EC:1.1.1.37] | hypothetical protein                        |
| K00026  | dazi_transcript_6954  | malate dehydrogenase [EC:1.1.1.37] | malate dehydrogenase, mitochondrial-like    |

|        |                       |                                               |                                                                         |
|--------|-----------------------|-----------------------------------------------|-------------------------------------------------------------------------|
| K00026 | dazi_transcript_7251  | malate dehydrogenase [EC:1.1.1.37]            | malate dehydrogenase, mitochondrial-like                                |
| K00026 | dazi_transcript_7309  | malate dehydrogenase [EC:1.1.1.37]            | malate dehydrogenase, mitochondrial-like                                |
| K00026 | dazi_transcript_7500  | malate dehydrogenase [EC:1.1.1.37]            | MDHG; malate dehydrogenase, glyoxysomal                                 |
| K00026 | dazi_transcript_7552  | malate dehydrogenase [EC:1.1.1.37]            | malate dehydrogenase, mitochondrial-like                                |
| K00026 | dazi_transcript_7748  | malate dehydrogenase [EC:1.1.1.37]            | Malate dehydrogenase, mitochondrial                                     |
| K00026 | dazi_transcript_7761  | malate dehydrogenase [EC:1.1.1.37]            | malate dehydrogenase, glyoxysomal                                       |
| K00026 | dazi_transcript_8409  | malate dehydrogenase [EC:1.1.1.37]            | malate dehydrogenase, mitochondrial-like                                |
| K00026 | dazi_transcript_16988 | malate dehydrogenase [EC:1.1.1.37]            | malate dehydrogenase, chloroplastic                                     |
| K00026 | dazi_transcript_22215 | malate dehydrogenase [EC:1.1.1.37]            | Malate dehydrogenase, mitochondrial                                     |
| K00026 | dazi_transcript_29577 | malate dehydrogenase [EC:1.1.1.37]            | malate dehydrogenase, chloroplastic                                     |
| K00026 | dazi_transcript_30831 | malate dehydrogenase [EC:1.1.1.37]            | malate dehydrogenase, mitochondrial-like                                |
| K00026 | dazi_transcript_33345 | malate dehydrogenase [EC:1.1.1.37]            | malate dehydrogenase, mitochondrial-like                                |
| K00030 | dazi_transcript_34638 | isocitrate dehydrogenase (NAD+) [EC:1.1.1.41] | isocitrate dehydrogenase [NAD] catalytic subunit 5, mitochondrial       |
| K00030 | dazi_transcript_37386 | isocitrate dehydrogenase (NAD+) [EC:1.1.1.41] | isocitrate dehydrogenase [NAD] regulatory subunit 1, mitochondrial      |
| K00030 | dazi_transcript_39450 | isocitrate dehydrogenase (NAD+) [EC:1.1.1.41] | isocitrate dehydrogenase [NAD] regulatory subunit 1, mitochondrial-like |
| K00030 | dazi_transcript_42410 | isocitrate dehydrogenase (NAD+) [EC:1.1.1.41] | isocitrate dehydrogenase [NAD] catalytic subunit 5, mitochondrial       |
| K00030 | dazi_transcript_49652 | isocitrate dehydrogenase (NAD+) [EC:1.1.1.41] | isocitrate dehydrogenase [NAD] regulatory subunit 1, mitochondrial      |
| K00030 | dazi_transcript_54776 | isocitrate dehydrogenase (NAD+) [EC:1.1.1.41] | isocitrate dehydrogenase [NAD] regulatory subunit 3, mitochondrial-like |
| K00030 | dazi_transcript_5701  | isocitrate dehydrogenase (NAD+) [EC:1.1.1.41] | isocitrate dehydrogenase [NAD] regulatory subunit 1, mitochondrial      |
| K00030 | dazi_transcript_57196 | isocitrate dehydrogenase (NAD+) [EC:1.1.1.41] | isocitrate dehydrogenase [NAD] regulatory subunit 1, mitochondrial      |
| K00030 | dazi_transcript_60344 | isocitrate dehydrogenase (NAD+) [EC:1.1.1.41] | isocitrate dehydrogenase [NAD] catalytic subunit 5, mitochondrial       |
| K00030 | dazi_transcript_6269  | isocitrate dehydrogenase (NAD+) [EC:1.1.1.41] | 3-isopropylmalate dehydrogenase, chloroplastic-like                     |
| K00030 | dazi_transcript_63251 | isocitrate dehydrogenase (NAD+) [EC:1.1.1.41] | isocitrate dehydrogenase [NAD] regulatory subunit 1, mitochondrial-like |
| K00030 | dazi_transcript_6479  | isocitrate dehydrogenase (NAD+) [EC:1.1.1.41] | isocitrate dehydrogenase [NAD] catalytic subunit 5, mitochondrial       |
| K00030 | dazi_transcript_65465 | isocitrate dehydrogenase (NAD+) [EC:1.1.1.41] | isocitrate dehydrogenase [NAD] regulatory subunit 1, mitochondrial      |

|        |                       |                                               |                                                                        |
|--------|-----------------------|-----------------------------------------------|------------------------------------------------------------------------|
| K00030 | dazi_transcript_66998 | isocitrate dehydrogenase (NAD+) [EC:1.1.1.41] | isocitrate dehydrogenase [NAD] regulatory subunit 1, mitochondrial     |
| K00030 | dazi_transcript_68442 | isocitrate dehydrogenase (NAD+) [EC:1.1.1.41] | isocitrate dehydrogenase [NAD] catalytic subunit 5, mitochondrial      |
| K00030 | dazi_transcript_68811 | isocitrate dehydrogenase (NAD+) [EC:1.1.1.41] | isocitrate dehydrogenase [NAD] catalytic subunit 5, mitochondrial      |
| K00030 | dazi_transcript_16863 | isocitrate dehydrogenase (NAD+) [EC:1.1.1.41] | isocitrate dehydrogenase [NAD] catalytic subunit 5, mitochondrial      |
| K00030 | dazi_transcript_7233  | isocitrate dehydrogenase (NAD+) [EC:1.1.1.41] | isocitrate dehydrogenase [NAD] catalytic subunit 5, mitochondrial      |
| K00030 | dazi_transcript_19974 | isocitrate dehydrogenase (NAD+) [EC:1.1.1.41] | isocitrate dehydrogenase [NAD] catalytic subunit 5, mitochondrial-like |
| K00030 | dazi_transcript_23710 | isocitrate dehydrogenase (NAD+) [EC:1.1.1.41] | hypothetical protein                                                   |
| K00030 | dazi_transcript_25423 | isocitrate dehydrogenase (NAD+) [EC:1.1.1.41] | isocitrate dehydrogenase [NAD] catalytic subunit 5, mitochondrial-like |
| K00030 | dazi_transcript_25761 | isocitrate dehydrogenase (NAD+) [EC:1.1.1.41] | isocitrate dehydrogenase [NAD] catalytic subunit 5, mitochondrial      |
| K00030 | dazi_transcript_29593 | isocitrate dehydrogenase (NAD+) [EC:1.1.1.41] | isocitrate dehydrogenase [NAD] regulatory subunit 1, mitochondrial     |
| K00031 | dazi_transcript_13591 | isocitrate dehydrogenase [EC:1.1.1.42]        | isocitrate dehydrogenase [NADP]                                        |
| K00031 | dazi_transcript_44362 | isocitrate dehydrogenase [EC:1.1.1.42]        | isocitrate dehydrogenase [NADP]                                        |
| K00031 | dazi_transcript_45358 | isocitrate dehydrogenase [EC:1.1.1.42]        | isocitrate dehydrogenase [NADP]                                        |
| K00031 | dazi_transcript_4923  | isocitrate dehydrogenase [EC:1.1.1.42]        | isocitrate dehydrogenase [NADP]                                        |
| K00031 | dazi_transcript_52277 | isocitrate dehydrogenase [EC:1.1.1.42]        | isocitrate dehydrogenase [NADP]-like                                   |
| K00031 | dazi_transcript_53183 | isocitrate dehydrogenase [EC:1.1.1.42]        | POPTRDRAFT_797853; hypothetical protein                                |
| K00031 | dazi_transcript_5586  | isocitrate dehydrogenase [EC:1.1.1.42]        | isocitrate dehydrogenase [NADP]                                        |
| K00031 | dazi_transcript_5623  | isocitrate dehydrogenase [EC:1.1.1.42]        | isocitrate dehydrogenase [NADP]                                        |
| K00031 | dazi_transcript_5679  | isocitrate dehydrogenase [EC:1.1.1.42]        | isocitrate dehydrogenase [NADP]                                        |
| K00031 | dazi_transcript_64568 | isocitrate dehydrogenase [EC:1.1.1.42]        | isocitrate dehydrogenase [NADP]                                        |
| K00031 | dazi_transcript_66563 | isocitrate dehydrogenase [EC:1.1.1.42]        | isocitrate dehydrogenase [NADP]                                        |
| K00051 | dazi_transcript_41117 | malate dehydrogenase (NADP+) [EC:1.1.1.82]    | malate dehydrogenase [NADP], chloroplastic-like                        |
| K00051 | dazi_transcript_4708  | malate dehydrogenase (NADP+) [EC:1.1.1.82]    | malate dehydrogenase [NADP], chloroplastic                             |
| K00051 | dazi_transcript_53002 | malate dehydrogenase (NADP+) [EC:1.1.1.82]    | malate dehydrogenase [NADP], chloroplastic                             |
| K00051 | dazi_transcript_60127 | malate dehydrogenase (NADP+) [EC:1.1.1.82]    | malate dehydrogenase [NADP], chloroplastic-like                        |
| K00052 | dazi_transcript_46648 | 3-isopropylmalate dehydrogenase [EC:1.1.1.85] | 3-isopropylmalate dehydrogenase 2, chloroplastic-like                  |
| K00052 | dazi_transcript_5041  | 3-isopropylmalate dehydrogenase [EC:1.1.1.85] | 3-isopropylmalate dehydrogenase, chloroplastic                         |

|        |                       |                                                        |                                                                     |
|--------|-----------------------|--------------------------------------------------------|---------------------------------------------------------------------|
| K00052 | dazi_transcript_70293 | 3-isopropylmalate dehydrogenase [EC:1.1.1.85]          | 3-isopropylmalate dehydrogenase, chloroplastic-like                 |
| K00052 | dazi_transcript_21880 | 3-isopropylmalate dehydrogenase [EC:1.1.1.85]          | 3-isopropylmalate dehydrogenase, chloroplastic                      |
| K00134 | dazi_transcript_12661 | glyceraldehyde 3-phosphate dehydrogenase [EC:1.2.1.12] | glyceraldehyde-3-phosphate dehydrogenase GAPC2, cytosolic           |
| K00134 | dazi_transcript_34834 | glyceraldehyde 3-phosphate dehydrogenase [EC:1.2.1.12] | glyceraldehyde-3-phosphate dehydrogenase GAPCP2, chloroplastic-like |
| K00134 | dazi_transcript_36921 | glyceraldehyde 3-phosphate dehydrogenase [EC:1.2.1.12] | glyceraldehyde-3-phosphate dehydrogenase GAPCP2, chloroplastic-like |
| K00134 | dazi_transcript_38587 | glyceraldehyde 3-phosphate dehydrogenase [EC:1.2.1.12] | glyceraldehyde-3-phosphate dehydrogenase, cytosolic                 |
| K00134 | dazi_transcript_41637 | glyceraldehyde 3-phosphate dehydrogenase [EC:1.2.1.12] | GAPDH; glyceraldehyde-3-phosphate dehydrogenase, cytosolic          |
| K00134 | dazi_transcript_13860 | glyceraldehyde 3-phosphate dehydrogenase [EC:1.2.1.12] | Glyceraldehyde-3-phosphate dehydrogenase C2 isoform 1               |
| K00134 | dazi_transcript_48738 | glyceraldehyde 3-phosphate dehydrogenase [EC:1.2.1.12] | glyceraldehyde-3-phosphate dehydrogenase GAPCP2, chloroplastic-like |
| K00134 | dazi_transcript_51374 | glyceraldehyde 3-phosphate dehydrogenase [EC:1.2.1.12] | glyceraldehyde-3-phosphate dehydrogenase, cytosolic                 |
| K00134 | dazi_transcript_52029 | glyceraldehyde 3-phosphate dehydrogenase [EC:1.2.1.12] | Glyceraldehyde-3-phosphate dehydrogenase C2 isoform 1               |
| K00134 | dazi_transcript_53952 | glyceraldehyde 3-phosphate dehydrogenase [EC:1.2.1.12] | glyceraldehyde-3-phosphate dehydrogenase, cytosolic                 |
| K00134 | dazi_transcript_56548 | glyceraldehyde 3-phosphate dehydrogenase [EC:1.2.1.12] | glyceraldehyde-3-phosphate dehydrogenase GAPC2, cytosolic           |
| K00134 | dazi_transcript_58186 | glyceraldehyde 3-phosphate dehydrogenase [EC:1.2.1.12] | glyceraldehyde-3-phosphate dehydrogenase, cytosolic                 |
| K00134 | dazi_transcript_59972 | glyceraldehyde 3-phosphate dehydrogenase [EC:1.2.1.12] | GAPDH; glyceraldehyde-3-phosphate dehydrogenase, cytosolic          |
| K00134 | dazi_transcript_62211 | glyceraldehyde 3-phosphate dehydrogenase [EC:1.2.1.12] | glyceraldehyde-3-phosphate dehydrogenase, cytosolic                 |
| K00134 | dazi_transcript_62238 | glyceraldehyde 3-phosphate dehydrogenase [EC:1.2.1.12] | glyceraldehyde-3-phosphate dehydrogenase, cytosolic                 |
| K00134 | dazi_transcript_6320  | glyceraldehyde 3-phosphate dehydrogenase [EC:1.2.1.12] | glyceraldehyde-3-phosphate dehydrogenase, cytosolic                 |
| K00134 | dazi_transcript_63604 | glyceraldehyde 3-phosphate dehydrogenase [EC:1.2.1.12] | glyceraldehyde-3-phosphate dehydrogenase GAPCP2, chloroplastic-like |
| K00134 | dazi_transcript_6384  | glyceraldehyde 3-phosphate dehydrogenase [EC:1.2.1.12] | GAPDH; glyceraldehyde-3-phosphate dehydrogenase, cytosolic          |
| K00134 | dazi_transcript_65630 | glyceraldehyde 3-phosphate dehydrogenase [EC:1.2.1.12] | glyceraldehyde-3-phosphate dehydrogenase GAPCP2, chloroplastic-like |
| K00134 | dazi_transcript_6904  | glyceraldehyde 3-phosphate dehydrogenase [EC:1.2.1.12] | glyceraldehyde-3-phosphate dehydrogenase, cytosolic                 |
| K00134 | dazi_transcript_7034  | glyceraldehyde 3-phosphate dehydrogenase [EC:1.2.1.12] | glyceraldehyde-3-phosphate dehydrogenase, cytosolic                 |
| K00134 | dazi_transcript_7083  | glyceraldehyde 3-phosphate dehydrogenase [EC:1.2.1.12] | glyceraldehyde-3-phosphate dehydrogenase, cytosolic-like            |
| K00134 | dazi_transcript_7943  | glyceraldehyde 3-phosphate dehydrogenase [EC:1.2.1.12] | GAPDH; glyceraldehyde-3-phosphate dehydrogenase, cytosolic          |



|        |                       |                                                                |                                                                       |
|--------|-----------------------|----------------------------------------------------------------|-----------------------------------------------------------------------|
| K00134 | dazi_transcript_8424  | glyceraldehyde 3-phosphate dehydrogenase [EC:1.2.1.12]         | GAPDH; glyceraldehyde-3-phosphate dehydrogenase, cytosolic            |
| K00134 | dazi_transcript_17874 | glyceraldehyde 3-phosphate dehydrogenase [EC:1.2.1.12]         | glyceraldehyde-3-phosphate dehydrogenase GAPCP2, chloroplastic-like   |
| K00134 | dazi_transcript_21528 | glyceraldehyde 3-phosphate dehydrogenase [EC:1.2.1.12]         | GAPDH; glyceraldehyde-3-phosphate dehydrogenase, cytosolic            |
| K00134 | dazi_transcript_29031 | glyceraldehyde 3-phosphate dehydrogenase [EC:1.2.1.12]         | glyceraldehyde-3-phosphate dehydrogenase GAPCP1, chloroplastic        |
| K00161 | dazi_transcript_45616 | pyruvate dehydrogenase E1 component alpha subunit [EC:1.2.4.1] | pyruvate dehydrogenase E1 component subunit alpha-like                |
| K00161 | dazi_transcript_4660  | pyruvate dehydrogenase E1 component alpha subunit [EC:1.2.4.1] | Pyruvate dehydrogenase E1 alpha, ALPHA                                |
| K00161 | dazi_transcript_4678  | pyruvate dehydrogenase E1 component alpha subunit [EC:1.2.4.1] | POPTRDRAFT_755473; hypothetical protein                               |
| K00161 | dazi_transcript_56532 | pyruvate dehydrogenase E1 component alpha subunit [EC:1.2.4.1] | pyruvate dehydrogenase E1 component subunit alpha-1, mitochondrial    |
| K00161 | dazi_transcript_59828 | pyruvate dehydrogenase E1 component alpha subunit [EC:1.2.4.1] | pyruvate dehydrogenase E1 component subunit alpha-3, chloroplastic    |
| K00161 | dazi_transcript_15875 | pyruvate dehydrogenase E1 component alpha subunit [EC:1.2.4.1] | pyruvate dehydrogenase E1 component subunit alpha, mitochondrial-like |
| K00161 | dazi_transcript_64260 | pyruvate dehydrogenase E1 component alpha subunit [EC:1.2.4.1] | pyruvate dehydrogenase E1 component subunit alpha, mitochondrial-like |
| K00161 | dazi_transcript_65306 | pyruvate dehydrogenase E1 component alpha subunit [EC:1.2.4.1] | pyruvate dehydrogenase E1 component subunit alpha-3, chloroplastic    |
| K00161 | dazi_transcript_66842 | pyruvate dehydrogenase E1 component alpha subunit [EC:1.2.4.1] | pyruvate dehydrogenase E1 component subunit alpha-3, chloroplastic    |
| K00161 | dazi_transcript_71292 | pyruvate dehydrogenase E1 component alpha subunit [EC:1.2.4.1] | pyruvate dehydrogenase E1 component subunit alpha-1, mitochondrial    |
| K00161 | dazi_transcript_20275 | pyruvate dehydrogenase E1 component alpha subunit [EC:1.2.4.1] | pyruvate dehydrogenase E1 component subunit alpha, mitochondrial      |
| K00161 | dazi_transcript_25102 | pyruvate dehydrogenase E1 component alpha subunit [EC:1.2.4.1] | pyruvate dehydrogenase E1 component subunit alpha, mitochondrial      |
| K00161 | dazi_transcript_30259 | pyruvate dehydrogenase E1 component alpha subunit [EC:1.2.4.1] | pyruvate dehydrogenase E1 component subunit alpha-3, chloroplastic    |
| K00161 | dazi_transcript_33985 | pyruvate dehydrogenase E1 component alpha subunit [EC:1.2.4.1] | pyruvate dehydrogenase E1 component subunit alpha, mitochondrial-like |
| K00162 | dazi_transcript_39431 | pyruvate dehydrogenase E1 component beta subunit [EC:1.2.4.1]  | pyruvate dehydrogenase E1 component subunit beta-1, mitochondrial     |
| K00162 | dazi_transcript_4570  | pyruvate dehydrogenase E1 component beta subunit [EC:1.2.4.1]  | hypothetical protein                                                  |
| K00162 | dazi_transcript_48781 | pyruvate dehydrogenase E1 component beta subunit [EC:1.2.4.1]  | hypothetical protein                                                  |
| K00162 | dazi_transcript_49361 | pyruvate dehydrogenase E1 component beta subunit [EC:1.2.4.1]  | pyruvate dehydrogenase E1 component subunit beta-1,                   |

|        |                       |                                                                        |                                                                                    |
|--------|-----------------------|------------------------------------------------------------------------|------------------------------------------------------------------------------------|
| K00162 | dazi_transcript_5451  | pyruvate dehydrogenase E1 component beta subunit [EC:1.2.4.1]          | mitochondrial<br>pyruvate dehydrogenase E1 component subunit beta-1, mitochondrial |
| K00162 | dazi_transcript_55966 | pyruvate dehydrogenase E1 component beta subunit [EC:1.2.4.1]          | pyruvate dehydrogenase E1 component subunit beta-1, mitochondrial                  |
| K00162 | dazi_transcript_6021  | pyruvate dehydrogenase E1 component beta subunit [EC:1.2.4.1]          | pyruvate dehydrogenase E1 component subunit beta-1, mitochondrial                  |
| K00162 | dazi_transcript_60235 | pyruvate dehydrogenase E1 component beta subunit [EC:1.2.4.1]          | pyruvate dehydrogenase E1 component subunit beta-1, mitochondrial                  |
| K00162 | dazi_transcript_61490 | pyruvate dehydrogenase E1 component beta subunit [EC:1.2.4.1]          | pyruvate dehydrogenase E1 component subunit beta-1, mitochondrial                  |
| K00162 | dazi_transcript_18804 | pyruvate dehydrogenase E1 component beta subunit [EC:1.2.4.1]          | pyruvate dehydrogenase E1 component subunit beta-1, mitochondrial                  |
| K00162 | dazi_transcript_21815 | pyruvate dehydrogenase E1 component beta subunit [EC:1.2.4.1]          | pyruvate dehydrogenase E1 component subunit beta-1, mitochondrial                  |
| K00162 | dazi_transcript_25937 | pyruvate dehydrogenase E1 component beta subunit [EC:1.2.4.1]          | pyruvate dehydrogenase E1 component subunit beta-1, mitochondrial                  |
| K00162 | dazi_transcript_30375 | pyruvate dehydrogenase E1 component beta subunit [EC:1.2.4.1]          | pyruvate dehydrogenase E1 component subunit beta-1, mitochondrial-like             |
| K00164 | dazi_transcript_42796 | 2-oxoglutarate dehydrogenase E1 component [EC:1.2.4.2]                 | 2-oxoglutarate dehydrogenase, mitochondrial-like                                   |
| K00164 | dazi_transcript_48257 | 2-oxoglutarate dehydrogenase E1 component [EC:1.2.4.2]                 | 2-oxoglutarate dehydrogenase, mitochondrial                                        |
| K00164 | dazi_transcript_54749 | 2-oxoglutarate dehydrogenase E1 component [EC:1.2.4.2]                 | 2-oxoglutarate dehydrogenase, mitochondrial                                        |
| K00164 | dazi_transcript_70726 | 2-oxoglutarate dehydrogenase E1 component [EC:1.2.4.2]                 | 2-oxoglutarate dehydrogenase, mitochondrial                                        |
| K00164 | dazi_transcript_18550 | 2-oxoglutarate dehydrogenase E1 component [EC:1.2.4.2]                 | 2-oxoglutarate dehydrogenase, mitochondrial-like                                   |
| K00234 | dazi_transcript_53139 | succinate dehydrogenase (ubiquinone) flavoprotein subunit [EC:1.3.5.1] | succinate dehydrogenase [ubiquinone] flavoprotein subunit 1, mitochondrial         |
| K00234 | dazi_transcript_1675  | succinate dehydrogenase (ubiquinone) flavoprotein subunit [EC:1.3.5.1] | succinate dehydrogenase [ubiquinone] flavoprotein subunit, mitochondrial           |
| K00234 | dazi_transcript_2087  | succinate dehydrogenase (ubiquinone) flavoprotein subunit [EC:1.3.5.1] | succinate dehydrogenase [ubiquinone] flavoprotein subunit, mitochondrial           |
| K00234 | dazi_transcript_2251  | succinate dehydrogenase (ubiquinone) flavoprotein subunit [EC:1.3.5.1] | succinate dehydrogenase [ubiquinone] flavoprotein subunit, mitochondrial           |
| K00235 | dazi_transcript_34759 | succinate dehydrogenase (ubiquinone) iron-sulfur subunit [EC:1.3.5.1]  | succinate dehydrogenase [ubiquinone] iron-sulfur subunit 2, mitochondrial-like     |
| K00235 | dazi_transcript_35061 | succinate dehydrogenase (ubiquinone) iron-sulfur subunit [EC:1.3.5.1]  | succinate dehydrogenase [ubiquinone] iron-sulfur subunit 2, mitochondrial-like     |
| K00235 | dazi_transcript_47141 | succinate dehydrogenase (ubiquinone) iron-sulfur subunit [EC:1.3.5.1]  | succinate dehydrogenase [ubiquinone] iron-sulfur subunit 2, mitochondrial          |

|        |                       |                                                                       |                                                                                |
|--------|-----------------------|-----------------------------------------------------------------------|--------------------------------------------------------------------------------|
| K00235 | dazi_transcript_62309 | succinate dehydrogenase (ubiquinone) iron-sulfur subunit [EC:1.3.5.1] | succinate dehydrogenase [ubiquinone] iron-sulfur subunit 2, mitochondrial-like |
| K00235 | dazi_transcript_9512  | succinate dehydrogenase (ubiquinone) iron-sulfur subunit [EC:1.3.5.1] | succinate dehydrogenase [ubiquinone] iron-sulfur subunit 2, mitochondrial-like |
| K00235 | dazi_transcript_23989 | succinate dehydrogenase (ubiquinone) iron-sulfur subunit [EC:1.3.5.1] | succinate dehydrogenase [ubiquinone] iron-sulfur subunit 2, mitochondrial-like |
| K00382 | dazi_transcript_34793 | dihydrolipoamide dehydrogenase [EC:1.8.1.4]                           | dihydrolipoyl dehydrogenase 2, chloroplastic-like                              |
| K00382 | dazi_transcript_4015  | dihydrolipoamide dehydrogenase [EC:1.8.1.4]                           | dihydrolipoyl dehydrogenase 1, mitochondrial                                   |
| K00382 | dazi_transcript_43987 | dihydrolipoamide dehydrogenase [EC:1.8.1.4]                           | dihydrolipoyl dehydrogenase 2, chloroplastic-like                              |
| K00382 | dazi_transcript_4451  | dihydrolipoamide dehydrogenase [EC:1.8.1.4]                           | dihydrolipoyl dehydrogenase 1, mitochondrial                                   |
| K00382 | dazi_transcript_5304  | dihydrolipoamide dehydrogenase [EC:1.8.1.4]                           | dihydrolipoyl dehydrogenase 1, mitochondrial                                   |
| K00382 | dazi_transcript_56555 | dihydrolipoamide dehydrogenase [EC:1.8.1.4]                           | dihydrolipoyl dehydrogenase 2, chloroplastic-like                              |
| K00382 | dazi_transcript_68135 | dihydrolipoamide dehydrogenase [EC:1.8.1.4]                           | dihydrolipoyl dehydrogenase 2, chloroplastic                                   |
| K00382 | dazi_transcript_70669 | dihydrolipoamide dehydrogenase [EC:1.8.1.4]                           | dihydrolipoyl dehydrogenase 1, mitochondrial                                   |
| K00382 | dazi_transcript_26753 | dihydrolipoamide dehydrogenase [EC:1.8.1.4]                           | dihydrolipoyl dehydrogenase 2, chloroplastic-like                              |
| K00382 | dazi_transcript_27766 | dihydrolipoamide dehydrogenase [EC:1.8.1.4]                           | dihydrolipoyl dehydrogenase 1, mitochondrial                                   |
| K00382 | dazi_transcript_30013 | dihydrolipoamide dehydrogenase [EC:1.8.1.4]                           | dihydrolipoyl dehydrogenase 1, mitochondrial                                   |
| K00382 | dazi_transcript_30638 | dihydrolipoamide dehydrogenase [EC:1.8.1.4]                           | dihydrolipoyl dehydrogenase 2, chloroplastic-like                              |
| K00600 | dazi_transcript_3465  | glycine hydroxymethyltransferase [EC:2.1.2.1]                         | serine hydroxymethyltransferase, mitochondrial                                 |
| K00600 | dazi_transcript_3573  | glycine hydroxymethyltransferase [EC:2.1.2.1]                         | serine hydroxymethyltransferase, mitochondrial                                 |
| K00600 | dazi_transcript_35788 | glycine hydroxymethyltransferase [EC:2.1.2.1]                         | serine hydroxymethyltransferase 4                                              |
| K00600 | dazi_transcript_3763  | glycine hydroxymethyltransferase [EC:2.1.2.1]                         | serine hydroxymethyltransferase, mitochondrial                                 |
| K00600 | dazi_transcript_3834  | glycine hydroxymethyltransferase [EC:2.1.2.1]                         | serine hydroxymethyltransferase 4                                              |
| K00600 | dazi_transcript_3867  | glycine hydroxymethyltransferase [EC:2.1.2.1]                         | serine hydroxymethyltransferase, mitochondrial                                 |
| K00600 | dazi_transcript_39032 | glycine hydroxymethyltransferase [EC:2.1.2.1]                         | serine hydroxymethyltransferase 4                                              |
| K00600 | dazi_transcript_4024  | glycine hydroxymethyltransferase [EC:2.1.2.1]                         | serine hydroxymethyltransferase, mitochondrial                                 |
| K00600 | dazi_transcript_40828 | glycine hydroxymethyltransferase [EC:2.1.2.1]                         | POPTRDRAFT_833897; Serine hydroxymethyltransferase family protein              |
| K00600 | dazi_transcript_4090  | glycine hydroxymethyltransferase [EC:2.1.2.1]                         | serine hydroxymethyltransferase, mitochondrial                                 |
| K00600 | dazi_transcript_41056 | glycine hydroxymethyltransferase [EC:2.1.2.1]                         | serine hydroxymethyltransferase 6-like                                         |
| K00600 | dazi_transcript_42074 | glycine hydroxymethyltransferase [EC:2.1.2.1]                         | serine hydroxymethyltransferase 4                                              |
| K00600 | dazi_transcript_42312 | glycine hydroxymethyltransferase [EC:2.1.2.1]                         | serine hydroxymethyltransferase 2, mitochondrial-like                          |
| K00600 | dazi_transcript_43097 | glycine hydroxymethyltransferase [EC:2.1.2.1]                         | serine hydroxymethyltransferase 7                                              |
| K00600 | dazi_transcript_43737 | glycine hydroxymethyltransferase [EC:2.1.2.1]                         | serine hydroxymethyltransferase, mitochondrial                                 |
| K00600 | dazi_transcript_447   | glycine hydroxymethyltransferase [EC:2.1.2.1]                         | hypothetical protein                                                           |

|        |                       |                                               |                                                       |
|--------|-----------------------|-----------------------------------------------|-------------------------------------------------------|
| K00600 | dazi_transcript_45158 | glycine hydroxymethyltransferase [EC:2.1.2.1] | serine hydroxymethyltransferase-like                  |
| K00600 | dazi_transcript_47289 | glycine hydroxymethyltransferase [EC:2.1.2.1] | serine hydroxymethyltransferase 7                     |
| K00600 | dazi_transcript_49871 | glycine hydroxymethyltransferase [EC:2.1.2.1] | serine hydroxymethyltransferase, mitochondrial        |
| K00600 | dazi_transcript_50080 | glycine hydroxymethyltransferase [EC:2.1.2.1] | serine hydroxymethyltransferase, mitochondrial        |
| K00600 | dazi_transcript_50957 | glycine hydroxymethyltransferase [EC:2.1.2.1] | serine hydroxymethyltransferase, mitochondrial        |
| K00600 | dazi_transcript_53377 | glycine hydroxymethyltransferase [EC:2.1.2.1] | serine hydroxymethyltransferase, mitochondrial        |
| K00600 | dazi_transcript_55189 | glycine hydroxymethyltransferase [EC:2.1.2.1] | serine hydroxymethyltransferase 2, mitochondrial-like |
| K00600 | dazi_transcript_55516 | glycine hydroxymethyltransferase [EC:2.1.2.1] | serine hydroxymethyltransferase 2, mitochondrial-like |
| K00600 | dazi_transcript_57656 | glycine hydroxymethyltransferase [EC:2.1.2.1] | serine hydroxymethyltransferase-like                  |
| K00600 | dazi_transcript_59913 | glycine hydroxymethyltransferase [EC:2.1.2.1] | serine hydroxymethyltransferase, mitochondrial        |
| K00600 | dazi_transcript_60298 | glycine hydroxymethyltransferase [EC:2.1.2.1] | serine hydroxymethyltransferase 7                     |
| K00600 | dazi_transcript_60988 | glycine hydroxymethyltransferase [EC:2.1.2.1] | serine hydroxymethyltransferase 7                     |
| K00600 | dazi_transcript_62304 | glycine hydroxymethyltransferase [EC:2.1.2.1] | POPTRDRAFT_643921; hypothetical protein               |
| K00600 | dazi_transcript_6234  | glycine hydroxymethyltransferase [EC:2.1.2.1] | serine hydroxymethyltransferase-like                  |
| K00600 | dazi_transcript_628   | glycine hydroxymethyltransferase [EC:2.1.2.1] | hypothetical protein                                  |
| K00600 | dazi_transcript_63140 | glycine hydroxymethyltransferase [EC:2.1.2.1] | serine hydroxymethyltransferase, mitochondrial        |
| K00600 | dazi_transcript_16157 | glycine hydroxymethyltransferase [EC:2.1.2.1] | serine hydroxymethyltransferase, mitochondrial        |
| K00600 | dazi_transcript_64705 | glycine hydroxymethyltransferase [EC:2.1.2.1] | serine hydroxymethyltransferase 6-like                |
| K00600 | dazi_transcript_65117 | glycine hydroxymethyltransferase [EC:2.1.2.1] | serine hydroxymethyltransferase, mitochondrial        |
| K00600 | dazi_transcript_65417 | glycine hydroxymethyltransferase [EC:2.1.2.1] | serine hydroxymethyltransferase, mitochondrial        |
| K00600 | dazi_transcript_66249 | glycine hydroxymethyltransferase [EC:2.1.2.1] | serine hydroxymethyltransferase 3, chloroplastic-like |
| K00600 | dazi_transcript_69178 | glycine hydroxymethyltransferase [EC:2.1.2.1] | serine hydroxymethyltransferase 2, mitochondrial-like |
| K00600 | dazi_transcript_69904 | glycine hydroxymethyltransferase [EC:2.1.2.1] | serine hydroxymethyltransferase 4                     |
| K00600 | dazi_transcript_70229 | glycine hydroxymethyltransferase [EC:2.1.2.1] | serine hydroxymethyltransferase, mitochondrial        |
| K00600 | dazi_transcript_71417 | glycine hydroxymethyltransferase [EC:2.1.2.1] | serine hydroxymethyltransferase 4                     |
| K00600 | dazi_transcript_17306 | glycine hydroxymethyltransferase [EC:2.1.2.1] | serine hydroxymethyltransferase, mitochondrial        |
| K00600 | dazi_transcript_21334 | glycine hydroxymethyltransferase [EC:2.1.2.1] | serine hydroxymethyltransferase 4                     |
| K00600 | dazi_transcript_24675 | glycine hydroxymethyltransferase [EC:2.1.2.1] | serine hydroxymethyltransferase 2, mitochondrial-like |
| K00600 | dazi_transcript_25409 | glycine hydroxymethyltransferase [EC:2.1.2.1] | serine hydroxymethyltransferase 7-like                |
| K00600 | dazi_transcript_2672  | glycine hydroxymethyltransferase [EC:2.1.2.1] | serine hydroxymethyltransferase, mitochondrial        |
| K00600 | dazi_transcript_28874 | glycine hydroxymethyltransferase [EC:2.1.2.1] | serine hydroxymethyltransferase 4                     |
| K00600 | dazi_transcript_29730 | glycine hydroxymethyltransferase [EC:2.1.2.1] | serine hydroxymethyltransferase 7                     |
| K00600 | dazi_transcript_31926 | glycine hydroxymethyltransferase [EC:2.1.2.1] | serine hydroxymethyltransferase 6-like                |
| K00600 | dazi_transcript_3260  | glycine hydroxymethyltransferase [EC:2.1.2.1] | serine hydroxymethyltransferase, mitochondrial        |

|        |                       |                                                                                        |                                                                                                                 |
|--------|-----------------------|----------------------------------------------------------------------------------------|-----------------------------------------------------------------------------------------------------------------|
| K00600 | dazi_transcript_3416  | glycine hydroxymethyltransferase [EC:2.1.2.1]                                          | serine hydroxymethyltransferase, mitochondrial                                                                  |
| K00600 | dazi_transcript_34493 | glycine hydroxymethyltransferase [EC:2.1.2.1]                                          | serine hydroxymethyltransferase 3, chloroplastic-like                                                           |
| K00611 | dazi_transcript_53423 | ornithine carbamoyltransferase [EC:2.1.3.3]                                            | ornithine carbamoyltransferase, chloroplastic                                                                   |
| K00611 | dazi_transcript_56801 | ornithine carbamoyltransferase [EC:2.1.3.3]                                            | ornithine carbamoyltransferase, chloroplastic                                                                   |
| K00611 | dazi_transcript_30554 | ornithine carbamoyltransferase [EC:2.1.3.3]                                            | ornithine carbamoyltransferase, chloroplastic                                                                   |
| K00615 | dazi_transcript_1017  | transketolase [EC:2.2.1.1]                                                             | transketolase, chloroplastic                                                                                    |
| K00615 | dazi_transcript_35691 | transketolase [EC:2.2.1.1]                                                             | transketolase, chloroplastic                                                                                    |
| K00615 | dazi_transcript_40480 | transketolase [EC:2.2.1.1]                                                             | transketolase, chloroplastic                                                                                    |
| K00615 | dazi_transcript_41359 | transketolase [EC:2.2.1.1]                                                             | transketolase, chloroplastic                                                                                    |
| K00615 | dazi_transcript_41821 | transketolase [EC:2.2.1.1]                                                             | transketolase, chloroplastic                                                                                    |
| K00615 | dazi_transcript_48461 | transketolase [EC:2.2.1.1]                                                             | transketolase, chloroplastic                                                                                    |
| K00615 | dazi_transcript_58322 | transketolase [EC:2.2.1.1]                                                             | transketolase, chloroplastic                                                                                    |
| K00615 | dazi_transcript_59456 | transketolase [EC:2.2.1.1]                                                             | transketolase, chloroplastic                                                                                    |
| K00615 | dazi_transcript_59767 | transketolase [EC:2.2.1.1]                                                             | transketolase, chloroplastic                                                                                    |
| K00615 | dazi_transcript_65645 | transketolase [EC:2.2.1.1]                                                             | transketolase, chloroplastic                                                                                    |
| K00615 | dazi_transcript_66990 | transketolase [EC:2.2.1.1]                                                             | transketolase, chloroplastic                                                                                    |
| K00615 | dazi_transcript_1852  | transketolase [EC:2.2.1.1]                                                             | transketolase, chloroplastic                                                                                    |
| K00615 | dazi_transcript_19024 | transketolase [EC:2.2.1.1]                                                             | transketolase, chloroplastic-like                                                                               |
| K00615 | dazi_transcript_19373 | transketolase [EC:2.2.1.1]                                                             | transketolase, chloroplastic                                                                                    |
| K00615 | dazi_transcript_1113  | transketolase [EC:2.2.1.1]                                                             | transketolase, chloroplastic                                                                                    |
| K00615 | dazi_transcript_26859 | transketolase [EC:2.2.1.1]                                                             | transketolase, chloroplastic                                                                                    |
| K00615 | dazi_transcript_29588 | transketolase [EC:2.2.1.1]                                                             | transketolase, chloroplastic                                                                                    |
| K00615 | dazi_transcript_30001 | transketolase [EC:2.2.1.1]                                                             | transketolase, chloroplastic                                                                                    |
| K00620 | dazi_transcript_63062 | glutamate N-acetyltransferase/amino-acid N-acetyltransferase [EC:2.3.1.35 2.3.1.1]     | arginine biosynthesis bifunctional protein ArgJ, chloroplastic                                                  |
| K00620 | dazi_transcript_9866  | glutamate N-acetyltransferase/amino-acid N-acetyltransferase [EC:2.3.1.35 2.3.1.1]     | arginine biosynthesis bifunctional protein ArgJ, chloroplastic                                                  |
| K00620 | dazi_transcript_2935  | glutamate N-acetyltransferase/amino-acid N-acetyltransferase [EC:2.3.1.35 2.3.1.1]     | arginine biosynthesis bifunctional protein ArgJ, chloroplastic-like                                             |
| K00627 | dazi_transcript_3795  | pyruvate dehydrogenase E2 component (dihydrolipoamide acetyltransferase) [EC:2.3.1.12] | dihydrolipoyllysine-residue acetyltransferase component 4 of pyruvate dehydrogenase complex, chloroplastic      |
| K00627 | dazi_transcript_3831  | pyruvate dehydrogenase E2 component (dihydrolipoamide acetyltransferase) [EC:2.3.1.12] | dihydrolipoyllysine-residue acetyltransferase component 5 of pyruvate dehydrogenase complex, chloroplastic      |
| K00627 | dazi_transcript_4223  | pyruvate dehydrogenase E2 component (dihydrolipoamide acetyltransferase) [EC:2.3.1.12] | dihydrolipoyllysine-residue acetyltransferase component 5 of pyruvate dehydrogenase complex, chloroplastic-like |

|        |                       |                                                                                                |                                                                                                                         |
|--------|-----------------------|------------------------------------------------------------------------------------------------|-------------------------------------------------------------------------------------------------------------------------|
| K00627 | dazi_transcript_1498  | pyruvate dehydrogenase E2 component (dihydrolipoamide acetyltransferase) [EC:2.3.1.12]         | dihydrolipoyllysine-residue acetyltransferase component 1 of pyruvate dehydrogenase complex, mitochondrial              |
| K00627 | dazi_transcript_53979 | pyruvate dehydrogenase E2 component (dihydrolipoamide acetyltransferase) [EC:2.3.1.12]         | dihydrolipoyllysine-residue acetyltransferase component 2 of pyruvate dehydrogenase complex, mitochondrial-like         |
| K00627 | dazi_transcript_57848 | pyruvate dehydrogenase E2 component (dihydrolipoamide acetyltransferase) [EC:2.3.1.12]         | dihydrolipoyllysine-residue acetyltransferase component 5 of pyruvate dehydrogenase complex, chloroplastic              |
| K00627 | dazi_transcript_60575 | pyruvate dehydrogenase E2 component (dihydrolipoamide acetyltransferase) [EC:2.3.1.12]         | dihydrolipoyllysine-residue acetyltransferase component 1 of pyruvate dehydrogenase complex, mitochondrial              |
| K00627 | dazi_transcript_20295 | pyruvate dehydrogenase E2 component (dihydrolipoamide acetyltransferase) [EC:2.3.1.12]         | dihydrolipoyllysine-residue acetyltransferase component 4 of pyruvate dehydrogenase complex, chloroplastic              |
| K00627 | dazi_transcript_2050  | pyruvate dehydrogenase E2 component (dihydrolipoamide acetyltransferase) [EC:2.3.1.12]         | dihydrolipoyllysine-residue acetyltransferase component 2 of pyruvate dehydrogenase complex, mitochondrial              |
| K00627 | dazi_transcript_2335  | pyruvate dehydrogenase E2 component (dihydrolipoamide acetyltransferase) [EC:2.3.1.12]         | Dihydrolipoamide acetyltransferase, long form protein isoform 1                                                         |
| K00627 | dazi_transcript_32891 | pyruvate dehydrogenase E2 component (dihydrolipoamide acetyltransferase) [EC:2.3.1.12]         | dihydrolipoyllysine-residue acetyltransferase component 4 of pyruvate dehydrogenase complex, chloroplastic              |
| K00627 | dazi_transcript_3301  | pyruvate dehydrogenase E2 component (dihydrolipoamide acetyltransferase) [EC:2.3.1.12]         | dihydrolipoyllysine-residue acetyltransferase component 5 of pyruvate dehydrogenase complex, chloroplastic              |
| K00658 | dazi_transcript_4014  | 2-oxoglutarate dehydrogenase E2 component (dihydrolipoamide succinyltransferase) [EC:2.3.1.61] | dihydrolipoyllysine-residue succinyltransferase component of 2-oxoglutarate dehydrogenase complex 1, mitochondrial      |
| K00658 | dazi_transcript_40609 | 2-oxoglutarate dehydrogenase E2 component (dihydrolipoamide succinyltransferase) [EC:2.3.1.61] | dihydrolipoyllysine-residue succinyltransferase component of 2-oxoglutarate dehydrogenase complex 1, mitochondrial      |
| K00658 | dazi_transcript_41229 | 2-oxoglutarate dehydrogenase E2 component (dihydrolipoamide succinyltransferase) [EC:2.3.1.61] | dihydrolipoyllysine-residue succinyltransferase component of 2-oxoglutarate dehydrogenase complex 2, mitochondrial-like |
| K00658 | dazi_transcript_46843 | 2-oxoglutarate dehydrogenase E2 component (dihydrolipoamide succinyltransferase) [EC:2.3.1.61] | dihydrolipoyllysine-residue succinyltransferase component of 2-oxoglutarate dehydrogenase complex 2, mitochondrial-like |
| K00658 | dazi_transcript_49663 | 2-oxoglutarate dehydrogenase E2 component (dihydrolipoamide succinyltransferase) [EC:2.3.1.61] | dihydrolipoyllysine-residue succinyltransferase component of 2-oxoglutarate dehydrogenase complex 2, mitochondrial-like |
| K00658 | dazi_transcript_50576 | 2-oxoglutarate dehydrogenase E2 component (dihydrolipoamide succinyltransferase) [EC:2.3.1.61] | dihydrolipoyllysine-residue succinyltransferase component of 2-oxoglutarate dehydrogenase complex 1, mitochondrial      |
| K00658 | dazi_transcript_57152 | 2-oxoglutarate dehydrogenase E2 component (dihydrolipoamide succinyltransferase) [EC:2.3.1.61] | dihydrolipoyllysine-residue succinyltransferase component of 2-oxoglutarate dehydrogenase complex 1, mitochondrial      |
| K00658 | dazi_transcript_68919 | 2-oxoglutarate dehydrogenase E2 component (dihydrolipoamide succinyltransferase) [EC:2.3.1.61] | dihydrolipoyllysine-residue succinyltransferase component of 2-oxoglutarate dehydrogenase complex 2, mitochondrial-like |

|        |                       |                                                          |                                                                                               |
|--------|-----------------------|----------------------------------------------------------|-----------------------------------------------------------------------------------------------|
| K00811 | dazi_transcript_4554  | aspartate aminotransferase, chloroplastic [EC:2.6.1.1]   | aspartate aminotransferase, chloroplastic                                                     |
| K00811 | dazi_transcript_56081 | aspartate aminotransferase, chloroplastic [EC:2.6.1.1]   | POPTRDRAFT_654206; aspartate aminotransferase 2 family protein                                |
| K00811 | dazi_transcript_63682 | aspartate aminotransferase, chloroplastic [EC:2.6.1.1]   | aspartate aminotransferase, chloroplastic                                                     |
| K00811 | dazi_transcript_7419  | aspartate aminotransferase, chloroplastic [EC:2.6.1.1]   | POPTRDRAFT_835828; aspartate aminotransferase 2 family protein                                |
| K00814 | dazi_transcript_4056  | alanine transaminase [EC:2.6.1.2]                        | alanine aminotransferase 2                                                                    |
| K00814 | dazi_transcript_44461 | alanine transaminase [EC:2.6.1.2]                        | alanine aminotransferase 2                                                                    |
| K00814 | dazi_transcript_51771 | alanine transaminase [EC:2.6.1.2]                        | hypothetical protein                                                                          |
| K00814 | dazi_transcript_53128 | alanine transaminase [EC:2.6.1.2]                        | hypothetical protein                                                                          |
| K00814 | dazi_transcript_57670 | alanine transaminase [EC:2.6.1.2]                        | alanine aminotransferase 2, mitochondrial-like                                                |
| K00814 | dazi_transcript_60475 | alanine transaminase [EC:2.6.1.2]                        | alanine aminotransferase 2-like                                                               |
| K00814 | dazi_transcript_63393 | alanine transaminase [EC:2.6.1.2]                        | alanine aminotransferase 2                                                                    |
| K00814 | dazi_transcript_2735  | alanine transaminase [EC:2.6.1.2]                        | alanine aminotransferase 2                                                                    |
| K00814 | dazi_transcript_34424 | alanine transaminase [EC:2.6.1.2]                        | alanine aminotransferase 2-like                                                               |
| K00815 | dazi_transcript_5045  | tyrosine aminotransferase [EC:2.6.1.5]                   | probable aminotransferase TAT2                                                                |
| K00815 | dazi_transcript_57141 | tyrosine aminotransferase [EC:2.6.1.5]                   | POPTRDRAFT_568851; hypothetical protein                                                       |
| K00815 | dazi_transcript_6220  | tyrosine aminotransferase [EC:2.6.1.5]                   | POPTRDRAFT_568851; hypothetical protein                                                       |
| K00815 | dazi_transcript_16279 | tyrosine aminotransferase [EC:2.6.1.5]                   | POPTRDRAFT_568851; hypothetical protein                                                       |
| K00815 | dazi_transcript_25491 | tyrosine aminotransferase [EC:2.6.1.5]                   | POPTRDRAFT_568851; hypothetical protein                                                       |
| K00815 | dazi_transcript_28692 | tyrosine aminotransferase [EC:2.6.1.5]                   | probable aminotransferase TAT2                                                                |
| K00826 | dazi_transcript_14876 | branched-chain amino acid aminotransferase [EC:2.6.1.42] | branched-chain-amino-acid aminotransferase 5, chloroplastic-like                              |
| K00826 | dazi_transcript_5603  | branched-chain amino acid aminotransferase [EC:2.6.1.42] | branched-chain-amino-acid aminotransferase 5, chloroplastic-like                              |
| K00826 | dazi_transcript_56951 | branched-chain amino acid aminotransferase [EC:2.6.1.42] | branched-chain-amino-acid aminotransferase 5, chloroplastic-like                              |
| K00826 | dazi_transcript_63522 | branched-chain amino acid aminotransferase [EC:2.6.1.42] | branched-chain-amino-acid aminotransferase 5, chloroplastic-like                              |
| K00826 | dazi_transcript_64406 | branched-chain amino acid aminotransferase [EC:2.6.1.42] | branched-chain-amino-acid aminotransferase 2, chloroplastic-like                              |
| K00826 | dazi_transcript_65618 | branched-chain amino acid aminotransferase [EC:2.6.1.42] | Branched-chain amino acid aminotransferase 5/branched-chain amino acid transaminase 5 (BCAT5) |
| K00826 | dazi_transcript_6675  | branched-chain amino acid aminotransferase [EC:2.6.1.42] | BCAT2; branched-chain amino acid aminotransferase                                             |
| K00826 | dazi_transcript_69612 | branched-chain amino acid aminotransferase [EC:2.6.1.42] | BCAT2; branched-chain amino acid aminotransferase                                             |
| K00826 | dazi_transcript_70265 | branched-chain amino acid aminotransferase [EC:2.6.1.42] | branched-chain-amino-acid aminotransferase 2,                                                 |

|        |                       |                                                          |                                                                                 |
|--------|-----------------------|----------------------------------------------------------|---------------------------------------------------------------------------------|
| K00826 | dazi_transcript_25426 | branched-chain amino acid aminotransferase [EC:2.6.1.42] | chloroplastic<br>branched-chain-amino-acid aminotransferase 3,<br>chloroplastic |
| K00826 | dazi_transcript_27896 | branched-chain amino acid aminotransferase [EC:2.6.1.42] | branched-chain-amino-acid aminotransferase 5,<br>chloroplastic-like             |
| K00831 | dazi_transcript_37351 | phosphoserine aminotransferase [EC:2.6.1.52]             | Pyridoxal phosphate (PLP)-dependent transferases<br>superfamily protein         |
| K00831 | dazi_transcript_37440 | phosphoserine aminotransferase [EC:2.6.1.52]             | phosphoserine aminotransferase 2, chloroplastic                                 |
| K00831 | dazi_transcript_40255 | phosphoserine aminotransferase [EC:2.6.1.52]             | Pyridoxal phosphate (PLP)-dependent transferases<br>superfamily protein         |
| K00831 | dazi_transcript_14565 | phosphoserine aminotransferase [EC:2.6.1.52]             | Pyridoxal phosphate (PLP)-dependent transferases<br>superfamily protein         |
| K00831 | dazi_transcript_5536  | phosphoserine aminotransferase [EC:2.6.1.52]             | phosphoserine aminotransferase 2, chloroplastic                                 |
| K00831 | dazi_transcript_5613  | phosphoserine aminotransferase [EC:2.6.1.52]             | phosphoserine aminotransferase 2, chloroplastic                                 |
| K00844 | dazi_transcript_37294 | hexokinase [EC:2.7.1.1]                                  | hexokinase-2, chloroplastic                                                     |
| K00844 | dazi_transcript_40004 | hexokinase [EC:2.7.1.1]                                  | hexokinase-2, chloroplastic                                                     |
| K00844 | dazi_transcript_44421 | hexokinase [EC:2.7.1.1]                                  | hexokinase-1                                                                    |
| K00844 | dazi_transcript_50247 | hexokinase [EC:2.7.1.1]                                  | HXK1; hexokinase-1                                                              |
| K00844 | dazi_transcript_54915 | hexokinase [EC:2.7.1.1]                                  | hexokinase-3-like                                                               |
| K00844 | dazi_transcript_56172 | hexokinase [EC:2.7.1.1]                                  | hexokinase-1                                                                    |
| K00844 | dazi_transcript_56837 | hexokinase [EC:2.7.1.1]                                  | hexokinase-1                                                                    |
| K00844 | dazi_transcript_56965 | hexokinase [EC:2.7.1.1]                                  | hexokinase-1                                                                    |
| K00844 | dazi_transcript_60301 | hexokinase [EC:2.7.1.1]                                  | Hexokinase-like 1                                                               |
| K00844 | dazi_transcript_61300 | hexokinase [EC:2.7.1.1]                                  | hexokinase-1                                                                    |
| K00844 | dazi_transcript_61569 | hexokinase [EC:2.7.1.1]                                  | hexokinase-3                                                                    |
| K00844 | dazi_transcript_64707 | hexokinase [EC:2.7.1.1]                                  | hexokinase-1                                                                    |
| K00844 | dazi_transcript_65033 | hexokinase [EC:2.7.1.1]                                  | hexokinase-2, chloroplastic                                                     |
| K00844 | dazi_transcript_65346 | hexokinase [EC:2.7.1.1]                                  | hexokinase-2, chloroplastic                                                     |
| K00844 | dazi_transcript_70680 | hexokinase [EC:2.7.1.1]                                  | hexokinase-3-like                                                               |
| K00844 | dazi_transcript_23631 | hexokinase [EC:2.7.1.1]                                  | hexokinase-2, chloroplastic                                                     |
| K00844 | dazi_transcript_26433 | hexokinase [EC:2.7.1.1]                                  | hexokinase-3-like                                                               |
| K00850 | dazi_transcript_38033 | 6-phosphofructokinase 1 [EC:2.7.1.11]                    | ATP-dependent 6-phosphofructokinase 5, chloroplastic                            |
| K00850 | dazi_transcript_39253 | 6-phosphofructokinase 1 [EC:2.7.1.11]                    | ATP-dependent 6-phosphofructokinase 4, chloroplastic                            |
| K00850 | dazi_transcript_39923 | 6-phosphofructokinase 1 [EC:2.7.1.11]                    | ATP-dependent 6-phosphofructokinase 5, chloroplastic                            |
| K00850 | dazi_transcript_41864 | 6-phosphofructokinase 1 [EC:2.7.1.11]                    | ATP-dependent 6-phosphofructokinase 5, chloroplastic                            |



|        |                       |                                       |                                                           |
|--------|-----------------------|---------------------------------------|-----------------------------------------------------------|
| K00850 | dazi_transcript_44031 | 6-phosphofructokinase 1 [EC:2.7.1.11] | ATP-dependent 6-phosphofructokinase 5, chloroplastic      |
| K00850 | dazi_transcript_48532 | 6-phosphofructokinase 1 [EC:2.7.1.11] | ATP-dependent 6-phosphofructokinase 5, chloroplastic      |
| K00850 | dazi_transcript_48585 | 6-phosphofructokinase 1 [EC:2.7.1.11] | ATP-dependent 6-phosphofructokinase 5, chloroplastic-like |
| K00850 | dazi_transcript_63655 | 6-phosphofructokinase 1 [EC:2.7.1.11] | ATP-dependent 6-phosphofructokinase 5, chloroplastic      |
| K00850 | dazi_transcript_71036 | 6-phosphofructokinase 1 [EC:2.7.1.11] | ATP-dependent 6-phosphofructokinase 3                     |
| K00850 | dazi_transcript_18078 | 6-phosphofructokinase 1 [EC:2.7.1.11] | ATP-dependent 6-phosphofructokinase 3                     |
| K00850 | dazi_transcript_2106  | 6-phosphofructokinase 1 [EC:2.7.1.11] | ATP-dependent 6-phosphofructokinase 6-like                |
| K00850 | dazi_transcript_22345 | 6-phosphofructokinase 1 [EC:2.7.1.11] | ATP-dependent 6-phosphofructokinase 3-like                |
| K00850 | dazi_transcript_23966 | 6-phosphofructokinase 1 [EC:2.7.1.11] | ATP-dependent 6-phosphofructokinase 5, chloroplastic      |
| K00850 | dazi_transcript_24727 | 6-phosphofructokinase 1 [EC:2.7.1.11] | ATP-dependent 6-phosphofructokinase 6                     |
| K00850 | dazi_transcript_25276 | 6-phosphofructokinase 1 [EC:2.7.1.11] | ATP-dependent 6-phosphofructokinase 3                     |
| K00850 | dazi_transcript_26081 | 6-phosphofructokinase 1 [EC:2.7.1.11] | ATP-dependent 6-phosphofructokinase 6                     |
| K00873 | dazi_transcript_3491  | pyruvate kinase [EC:2.7.1.40]         | pyruvate kinase 1, cytosolic                              |
| K00873 | dazi_transcript_36346 | pyruvate kinase [EC:2.7.1.40]         | plastidial pyruvate kinase 2-like                         |
| K00873 | dazi_transcript_37573 | pyruvate kinase [EC:2.7.1.40]         | pyruvate kinase 2, cytosolic-like                         |
| K00873 | dazi_transcript_37909 | pyruvate kinase [EC:2.7.1.40]         | pyruvate kinase 1, cytosolic                              |
| K00873 | dazi_transcript_37938 | pyruvate kinase [EC:2.7.1.40]         | pyruvate kinase, cytosolic isozyme                        |
| K00873 | dazi_transcript_38633 | pyruvate kinase [EC:2.7.1.40]         | plastidial pyruvate kinase 4, chloroplastic               |
| K00873 | dazi_transcript_39804 | pyruvate kinase [EC:2.7.1.40]         | pyruvate kinase, cytosolic isozyme                        |
| K00873 | dazi_transcript_39840 | pyruvate kinase [EC:2.7.1.40]         | pyruvate kinase 1, cytosolic                              |
| K00873 | dazi_transcript_40544 | pyruvate kinase [EC:2.7.1.40]         | pyruvate kinase, cytosolic isozyme                        |
| K00873 | dazi_transcript_40919 | pyruvate kinase [EC:2.7.1.40]         | pyruvate kinase, cytosolic isozyme                        |
| K00873 | dazi_transcript_43092 | pyruvate kinase [EC:2.7.1.40]         | PK; pyruvate kinase                                       |
| K00873 | dazi_transcript_44169 | pyruvate kinase [EC:2.7.1.40]         | plastidial pyruvate kinase 2-like                         |
| K00873 | dazi_transcript_45956 | pyruvate kinase [EC:2.7.1.40]         | plastidial pyruvate kinase 2-like                         |
| K00873 | dazi_transcript_48439 | pyruvate kinase [EC:2.7.1.40]         | Plastidic pyruvate kinase beta subunit 1 isoform 1        |
| K00873 | dazi_transcript_1438  | pyruvate kinase [EC:2.7.1.40]         | pyruvate kinase isozyme A, chloroplastic-like             |
| K00873 | dazi_transcript_51440 | pyruvate kinase [EC:2.7.1.40]         | plastidial pyruvate kinase 4, chloroplastic               |
| K00873 | dazi_transcript_53287 | pyruvate kinase [EC:2.7.1.40]         | PK; pyruvate kinase                                       |
| K00873 | dazi_transcript_54196 | pyruvate kinase [EC:2.7.1.40]         | plastidial pyruvate kinase 4, chloroplastic               |
| K00873 | dazi_transcript_57101 | pyruvate kinase [EC:2.7.1.40]         | PK; pyruvate kinase                                       |
| K00873 | dazi_transcript_57985 | pyruvate kinase [EC:2.7.1.40]         | pyruvate kinase isozyme A, chloroplastic                  |
| K00873 | dazi_transcript_59479 | pyruvate kinase [EC:2.7.1.40]         | plastidial pyruvate kinase 2-like                         |
| K00873 | dazi_transcript_59758 | pyruvate kinase [EC:2.7.1.40]         | pyruvate kinase, cytosolic isozyme                        |

|        |                       |                                      |                                             |
|--------|-----------------------|--------------------------------------|---------------------------------------------|
| K00873 | dazi_transcript_59830 | pyruvate kinase [EC:2.7.1.40]        | Pyruvate kinase isozyme A, chloroplastic    |
| K00873 | dazi_transcript_60053 | pyruvate kinase [EC:2.7.1.40]        | pyruvate kinase isozyme A, chloroplastic    |
| K00873 | dazi_transcript_60862 | pyruvate kinase [EC:2.7.1.40]        | pyruvate kinase family protein              |
| K00873 | dazi_transcript_64134 | pyruvate kinase [EC:2.7.1.40]        | Pyruvate kinase isozyme G, chloroplastic    |
| K00873 | dazi_transcript_68089 | pyruvate kinase [EC:2.7.1.40]        | pyruvate kinase 1, cytosolic                |
| K00873 | dazi_transcript_16492 | pyruvate kinase [EC:2.7.1.40]        | Pyruvate kinase family protein              |
| K00873 | dazi_transcript_16909 | pyruvate kinase [EC:2.7.1.40]        | pyruvate kinase, cytosolic isozyme          |
| K00873 | dazi_transcript_71045 | pyruvate kinase [EC:2.7.1.40]        | pyruvate kinase, cytosolic isozyme          |
| K00873 | dazi_transcript_17026 | pyruvate kinase [EC:2.7.1.40]        | pyruvate kinase 1, cytosolic                |
| K00873 | dazi_transcript_9096  | pyruvate kinase [EC:2.7.1.40]        | pyruvate kinase, cytosolic isozyme-like     |
| K00873 | dazi_transcript_17916 | pyruvate kinase [EC:2.7.1.40]        | pyruvate kinase isozyme A, chloroplastic    |
| K00873 | dazi_transcript_20272 | pyruvate kinase [EC:2.7.1.40]        | pyruvate kinase, cytosolic isozyme          |
| K00873 | dazi_transcript_20982 | pyruvate kinase [EC:2.7.1.40]        | pyruvate kinase, cytosolic isozyme          |
| K00873 | dazi_transcript_22861 | pyruvate kinase [EC:2.7.1.40]        | Pyruvate kinase family protein isoform 1    |
| K00873 | dazi_transcript_25251 | pyruvate kinase [EC:2.7.1.40]        | pyruvate kinase, cytosolic isozyme          |
| K00873 | dazi_transcript_25395 | pyruvate kinase [EC:2.7.1.40]        | pyruvate kinase isozyme A, chloroplastic    |
| K00873 | dazi_transcript_2673  | pyruvate kinase [EC:2.7.1.40]        | pyruvate kinase 1, cytosolic                |
| K00873 | dazi_transcript_2851  | pyruvate kinase [EC:2.7.1.40]        | POPTRDRAFT_660010; hypothetical protein     |
| K00873 | dazi_transcript_29460 | pyruvate kinase [EC:2.7.1.40]        | pyruvate kinase isozyme A, chloroplastic    |
| K00873 | dazi_transcript_3076  | pyruvate kinase [EC:2.7.1.40]        | pyruvate kinase, cytosolic isozyme          |
| K00873 | dazi_transcript_3166  | pyruvate kinase [EC:2.7.1.40]        | pyruvate kinase family protein              |
| K00927 | dazi_transcript_36237 | phosphoglycerate kinase [EC:2.7.2.3] | phosphoglycerate kinase, cytosolic          |
| K00927 | dazi_transcript_4632  | phosphoglycerate kinase [EC:2.7.2.3] | phosphoglycerate kinase, cytosolic          |
| K00927 | dazi_transcript_47919 | phosphoglycerate kinase [EC:2.7.2.3] | phosphoglycerate kinase, chloroplastic      |
| K00927 | dazi_transcript_47944 | phosphoglycerate kinase [EC:2.7.2.3] | phosphoglycerate kinase, chloroplastic      |
| K00927 | dazi_transcript_53507 | phosphoglycerate kinase [EC:2.7.2.3] | phosphoglycerate kinase, cytosolic          |
| K00927 | dazi_transcript_54008 | phosphoglycerate kinase [EC:2.7.2.3] | phosphoglycerate kinase, cytosolic-like     |
| K00927 | dazi_transcript_5707  | phosphoglycerate kinase [EC:2.7.2.3] | phosphoglycerate kinase, cytosolic          |
| K00927 | dazi_transcript_69684 | phosphoglycerate kinase [EC:2.7.2.3] | phosphoglycerate kinase, cytosolic          |
| K00927 | dazi_transcript_70876 | phosphoglycerate kinase [EC:2.7.2.3] | phosphoglycerate kinase, chloroplastic-like |
| K00927 | dazi_transcript_21365 | phosphoglycerate kinase [EC:2.7.2.3] | phosphoglycerate kinase-like protein        |
| K00927 | dazi_transcript_23526 | phosphoglycerate kinase [EC:2.7.2.3] | phosphoglycerate kinase, cytosolic          |
| K00927 | dazi_transcript_30923 | phosphoglycerate kinase [EC:2.7.2.3] | phosphoglycerate kinase, chloroplastic      |
| K00927 | dazi_transcript_31850 | phosphoglycerate kinase [EC:2.7.2.3] | phosphoglycerate kinase, cytosolic          |

|        |                       |                                                       |                                                          |
|--------|-----------------------|-------------------------------------------------------|----------------------------------------------------------|
| K00927 | dazi_transcript_32596 | phosphoglycerate kinase [EC:2.7.2.3]                  | phosphoglycerate kinase, chloroplastic                   |
| K01079 | dazi_transcript_57162 | phosphoserine phosphatase [EC:3.1.3.3]                | phosphoserine phosphatase, chloroplastic                 |
| K01079 | dazi_transcript_66420 | phosphoserine phosphatase [EC:3.1.3.3]                | phosphoserine phosphatase, chloroplastic                 |
| K01438 | dazi_transcript_6559  | acetylornithine deacetylase [EC:3.5.1.16]             | acetylornithine deacetylase                              |
| K01620 | dazi_transcript_23193 | threonine aldolase [EC:4.1.2.48]                      | probable low-specificity L-threonine aldolase 1          |
| K01620 | dazi_transcript_34068 | threonine aldolase [EC:4.1.2.48]                      | probable low-specificity L-threonine aldolase 1          |
| K01623 | dazi_transcript_40238 | fructose-bisphosphate aldolase, class I [EC:4.1.2.13] | fructose-bisphosphate aldolase 1, chloroplastic          |
| K01623 | dazi_transcript_42920 | fructose-bisphosphate aldolase, class I [EC:4.1.2.13] | fructose-bisphosphate aldolase cytoplasmic isozyme       |
| K01623 | dazi_transcript_43864 | fructose-bisphosphate aldolase, class I [EC:4.1.2.13] | fructose-bisphosphate aldolase, cytoplasmic isozyme 1    |
| K01623 | dazi_transcript_44808 | fructose-bisphosphate aldolase, class I [EC:4.1.2.13] | fructose-bisphosphate aldolase cytoplasmic isozyme       |
| K01623 | dazi_transcript_48183 | fructose-bisphosphate aldolase, class I [EC:4.1.2.13] | hypothetical protein                                     |
| K01623 | dazi_transcript_48400 | fructose-bisphosphate aldolase, class I [EC:4.1.2.13] | probable fructose-bisphosphate aldolase 3, chloroplastic |
| K01623 | dazi_transcript_14352 | fructose-bisphosphate aldolase, class I [EC:4.1.2.13] | fructose-bisphosphate aldolase cytoplasmic isozyme       |
| K01623 | dazi_transcript_49228 | fructose-bisphosphate aldolase, class I [EC:4.1.2.13] | fructose-bisphosphate aldolase 1, chloroplastic          |
| K01623 | dazi_transcript_5430  | fructose-bisphosphate aldolase, class I [EC:4.1.2.13] | probable fructose-bisphosphate aldolase 3, chloroplastic |
| K01623 | dazi_transcript_5690  | fructose-bisphosphate aldolase, class I [EC:4.1.2.13] | probable fructose-bisphosphate aldolase 3, chloroplastic |
| K01623 | dazi_transcript_5705  | fructose-bisphosphate aldolase, class I [EC:4.1.2.13] | fructose-bisphosphate aldolase cytoplasmic isozyme       |
| K01623 | dazi_transcript_6027  | fructose-bisphosphate aldolase, class I [EC:4.1.2.13] | fructose-bisphosphate aldolase 1, chloroplastic          |
| K01623 | dazi_transcript_60332 | fructose-bisphosphate aldolase, class I [EC:4.1.2.13] | fructose-bisphosphate aldolase cytoplasmic isozyme       |
| K01623 | dazi_transcript_6138  | fructose-bisphosphate aldolase, class I [EC:4.1.2.13] | fructose-bisphosphate aldolase 1, chloroplastic          |
| K01623 | dazi_transcript_6142  | fructose-bisphosphate aldolase, class I [EC:4.1.2.13] | probable fructose-bisphosphate aldolase 3, chloroplastic |
| K01623 | dazi_transcript_6237  | fructose-bisphosphate aldolase, class I [EC:4.1.2.13] | fructose-bisphosphate aldolase 1, chloroplastic          |
| K01623 | dazi_transcript_64747 | fructose-bisphosphate aldolase, class I [EC:4.1.2.13] | fructose-bisphosphate aldolase 1, chloroplastic          |
| K01623 | dazi_transcript_6513  | fructose-bisphosphate aldolase, class I [EC:4.1.2.13] | fructose-bisphosphate aldolase cytoplasmic isozyme       |
| K01623 | dazi_transcript_66273 | fructose-bisphosphate aldolase, class I [EC:4.1.2.13] | probable fructose-bisphosphate aldolase 3, chloroplastic |
| K01623 | dazi_transcript_66561 | fructose-bisphosphate aldolase, class I [EC:4.1.2.13] | probable fructose-bisphosphate aldolase 3, chloroplastic |
| K01623 | dazi_transcript_6957  | fructose-bisphosphate aldolase, class I [EC:4.1.2.13] | fructose-bisphosphate aldolase, cytoplasmic isozyme 1    |
| K01623 | dazi_transcript_70475 | fructose-bisphosphate aldolase, class I [EC:4.1.2.13] | fructose-bisphosphate aldolase cytoplasmic isozyme       |
| K01623 | dazi_transcript_7177  | fructose-bisphosphate aldolase, class I [EC:4.1.2.13] | fructose-bisphosphate aldolase 1, chloroplastic          |
| K01623 | dazi_transcript_18657 | fructose-bisphosphate aldolase, class I [EC:4.1.2.13] | fructose-bisphosphate aldolase 1, chloroplastic          |
| K01623 | dazi_transcript_20204 | fructose-bisphosphate aldolase, class I [EC:4.1.2.13] | probable fructose-bisphosphate aldolase 3, chloroplastic |
| K01623 | dazi_transcript_22055 | fructose-bisphosphate aldolase, class I [EC:4.1.2.13] | probable fructose-bisphosphate aldolase 3, chloroplastic |
| K01623 | dazi_transcript_23000 | fructose-bisphosphate aldolase, class I [EC:4.1.2.13] | probable fructose-bisphosphate aldolase 3, chloroplastic |
| K01623 | dazi_transcript_32632 | fructose-bisphosphate aldolase, class I [EC:4.1.2.13] | fructose-bisphosphate aldolase, cytoplasmic isozyme 1    |

|        |                       |                                                       |                                                    |
|--------|-----------------------|-------------------------------------------------------|----------------------------------------------------|
| K01623 | dazi_transcript_33083 | fructose-bisphosphate aldolase, class I [EC:4.1.2.13] | fructose-bisphosphate aldolase cytoplasmic isozyme |
| K01647 | dazi_transcript_37295 | citrate synthase [EC:2.3.3.1]                         | citrate synthase, mitochondrial                    |
| K01647 | dazi_transcript_38737 | citrate synthase [EC:2.3.3.1]                         | citrate synthase, glyoxysomal                      |
| K01647 | dazi_transcript_3928  | citrate synthase [EC:2.3.3.1]                         | citrate synthase, mitochondrial                    |
| K01647 | dazi_transcript_41833 | citrate synthase [EC:2.3.3.1]                         | citrate synthase, mitochondrial                    |
| K01647 | dazi_transcript_4212  | citrate synthase [EC:2.3.3.1]                         | citrate synthase, mitochondrial                    |
| K01647 | dazi_transcript_50836 | citrate synthase [EC:2.3.3.1]                         | citrate synthase, mitochondrial                    |
| K01647 | dazi_transcript_56624 | citrate synthase [EC:2.3.3.1]                         | citrate synthase, glyoxysomal                      |
| K01647 | dazi_transcript_16951 | citrate synthase [EC:2.3.3.1]                         | citrate synthase, mitochondrial                    |
| K01647 | dazi_transcript_2891  | citrate synthase [EC:2.3.3.1]                         | citrate synthase, glyoxysomal                      |
| K01647 | dazi_transcript_3228  | citrate synthase [EC:2.3.3.1]                         | citrate synthase, glyoxysomal                      |
| K01647 | dazi_transcript_3341  | citrate synthase [EC:2.3.3.1]                         | citrate synthase, glyoxysomal                      |
| K01679 | dazi_transcript_35982 | fumarate hydratase, class II [EC:4.2.1.2]             | fumarate hydratase 1, mitochondrial                |
| K01679 | dazi_transcript_62313 | fumarate hydratase, class II [EC:4.2.1.2]             | hypothetical protein                               |
| K01679 | dazi_transcript_68603 | fumarate hydratase, class II [EC:4.2.1.2]             | fumarate hydratase 1, mitochondrial                |
| K01679 | dazi_transcript_30757 | fumarate hydratase, class II [EC:4.2.1.2]             | fumarate hydratase 1, mitochondrial                |
| K01681 | dazi_transcript_46018 | aconitate hydratase [EC:4.2.1.3]                      | aconitate hydratase, cytoplasmic                   |
| K01681 | dazi_transcript_46026 | aconitate hydratase [EC:4.2.1.3]                      | aconitate hydratase                                |
| K01681 | dazi_transcript_48506 | aconitate hydratase [EC:4.2.1.3]                      | aconitate hydratase, cytoplasmic                   |
| K01681 | dazi_transcript_48964 | aconitate hydratase [EC:4.2.1.3]                      | aconitate hydratase, cytoplasmic                   |
| K01681 | dazi_transcript_51091 | aconitate hydratase [EC:4.2.1.3]                      | aconitate hydratase, cytoplasmic                   |
| K01681 | dazi_transcript_54057 | aconitate hydratase [EC:4.2.1.3]                      | putative aconitate hydratase, cytoplasmic          |
| K01681 | dazi_transcript_64398 | aconitate hydratase [EC:4.2.1.3]                      | aconitate hydratase, cytoplasmic                   |
| K01681 | dazi_transcript_19444 | aconitate hydratase [EC:4.2.1.3]                      | aconitate hydratase, cytoplasmic                   |
| K01681 | dazi_transcript_205   | aconitate hydratase [EC:4.2.1.3]                      | aconitate hydratase, cytoplasmic                   |
| K01681 | dazi_transcript_20628 | aconitate hydratase [EC:4.2.1.3]                      | aconitate hydratase, cytoplasmic                   |
| K01681 | dazi_transcript_210   | aconitate hydratase [EC:4.2.1.3]                      | aconitate hydratase, cytoplasmic                   |
| K01681 | dazi_transcript_243   | aconitate hydratase [EC:4.2.1.3]                      | aconitate hydratase, cytoplasmic                   |
| K01681 | dazi_transcript_249   | aconitate hydratase [EC:4.2.1.3]                      | aconitate hydratase, cytoplasmic-like              |
| K01681 | dazi_transcript_250   | aconitate hydratase [EC:4.2.1.3]                      | aconitate hydratase, cytoplasmic                   |
| K01681 | dazi_transcript_32137 | aconitate hydratase [EC:4.2.1.3]                      | aconitate hydratase, cytoplasmic                   |
| K01687 | dazi_transcript_9805  | dihydroxy-acid dehydratase [EC:4.2.1.9]               | dihydroxy-acid dehydratase, chloroplastic-like     |
| K01687 | dazi_transcript_1868  | dihydroxy-acid dehydratase [EC:4.2.1.9]               | dihydroxy-acid dehydratase, chloroplastic-like     |
| K01687 | dazi_transcript_2099  | dihydroxy-acid dehydratase [EC:4.2.1.9]               | dihydroxy-acid dehydratase-like                    |

|        |                       |                                   |                                                       |
|--------|-----------------------|-----------------------------------|-------------------------------------------------------|
| K01689 | dazi_transcript_37881 | enolase [EC:4.2.1.11]             | cytosolic enolase 3                                   |
| K01689 | dazi_transcript_4206  | enolase [EC:4.2.1.11]             | enolase                                               |
| K01689 | dazi_transcript_42968 | enolase [EC:4.2.1.11]             | cytosolic enolase 3                                   |
| K01689 | dazi_transcript_43695 | enolase [EC:4.2.1.11]             | enolase                                               |
| K01689 | dazi_transcript_13788 | enolase [EC:4.2.1.11]             | enolase                                               |
| K01689 | dazi_transcript_4648  | enolase [EC:4.2.1.11]             | enolase                                               |
| K01689 | dazi_transcript_4760  | enolase [EC:4.2.1.11]             | enolase                                               |
| K01689 | dazi_transcript_48465 | enolase [EC:4.2.1.11]             | enolase                                               |
| K01689 | dazi_transcript_14504 | enolase [EC:4.2.1.11]             | bifunctional enolase 2/transcriptional activator-like |
| K01689 | dazi_transcript_49592 | enolase [EC:4.2.1.11]             | enolase                                               |
| K01689 | dazi_transcript_50939 | enolase [EC:4.2.1.11]             | enolase                                               |
| K01689 | dazi_transcript_58980 | enolase [EC:4.2.1.11]             | enolase                                               |
| K01689 | dazi_transcript_58986 | enolase [EC:4.2.1.11]             | Enolase 1 isoform 1                                   |
| K01689 | dazi_transcript_62910 | enolase [EC:4.2.1.11]             | enolase 1, chloroplastic                              |
| K01689 | dazi_transcript_8233  | enolase [EC:4.2.1.11]             | enolase                                               |
| K01689 | dazi_transcript_20519 | enolase [EC:4.2.1.11]             | enolase                                               |
| K01689 | dazi_transcript_20799 | enolase [EC:4.2.1.11]             | enolase 2-like                                        |
| K01689 | dazi_transcript_25640 | enolase [EC:4.2.1.11]             | cytosolic enolase 3                                   |
| K01689 | dazi_transcript_27630 | enolase [EC:4.2.1.11]             | enolase                                               |
| K01736 | dazi_transcript_36687 | chorismate synthase [EC:4.2.3.5]  | chorismate synthase 2, chloroplastic                  |
| K01736 | dazi_transcript_42131 | chorismate synthase [EC:4.2.3.5]  | chorismate synthase 2, chloroplastic                  |
| K01736 | dazi_transcript_47034 | chorismate synthase [EC:4.2.3.5]  | chorismate synthase 1, chloroplastic                  |
| K01736 | dazi_transcript_51304 | chorismate synthase [EC:4.2.3.5]  | chorismate synthase 1, chloroplastic                  |
| K01736 | dazi_transcript_5194  | chorismate synthase [EC:4.2.3.5]  | chorismate synthase 1, chloroplastic                  |
| K01736 | dazi_transcript_5628  | chorismate synthase [EC:4.2.3.5]  | chorismate synthase 2, chloroplastic                  |
| K01736 | dazi_transcript_56305 | chorismate synthase [EC:4.2.3.5]  | chorismate synthase 1, chloroplastic                  |
| K01736 | dazi_transcript_5859  | chorismate synthase [EC:4.2.3.5]  | chorismate synthase 2, chloroplastic                  |
| K01736 | dazi_transcript_15927 | chorismate synthase [EC:4.2.3.5]  | chorismate synthase 1, chloroplastic                  |
| K01736 | dazi_transcript_6244  | chorismate synthase [EC:4.2.3.5]  | chorismate synthase 1, chloroplastic                  |
| K01736 | dazi_transcript_62893 | chorismate synthase [EC:4.2.3.5]  | chorismate synthase 1, chloroplastic                  |
| K01736 | dazi_transcript_70564 | chorismate synthase [EC:4.2.3.5]  | chorismate synthase 2, chloroplastic                  |
| K01736 | dazi_transcript_26441 | chorismate synthase [EC:4.2.3.5]  | chorismate synthase 2, chloroplastic                  |
| K01736 | dazi_transcript_33318 | chorismate synthase [EC:4.2.3.5]  | chorismate synthase 2, chloroplastic                  |
| K01738 | dazi_transcript_42729 | cysteine synthase A [EC:2.5.1.47] | cysteine synthase                                     |

|        |                       |                                                                         |                                                       |
|--------|-----------------------|-------------------------------------------------------------------------|-------------------------------------------------------|
| K01738 | dazi_transcript_43599 | cysteine synthase A [EC:2.5.1.47]                                       | cysteine synthase                                     |
| K01738 | dazi_transcript_53291 | cysteine synthase A [EC:2.5.1.47]                                       | cysteine synthase                                     |
| K01738 | dazi_transcript_53520 | cysteine synthase A [EC:2.5.1.47]                                       | cysteine synthase                                     |
| K01738 | dazi_transcript_58886 | cysteine synthase A [EC:2.5.1.47]                                       | cysteine synthase                                     |
| K01738 | dazi_transcript_59473 | cysteine synthase A [EC:2.5.1.47]                                       | hypothetical protein                                  |
| K01738 | dazi_transcript_6355  | cysteine synthase A [EC:2.5.1.47]                                       | cysteine synthase, chloroplastic/chromoplastic        |
| K01738 | dazi_transcript_64737 | cysteine synthase A [EC:2.5.1.47]                                       | Pyridoxal-5-phosphate-dependent enzyme family protein |
| K01738 | dazi_transcript_16943 | cysteine synthase A [EC:2.5.1.47]                                       | cysteine synthase                                     |
| K01738 | dazi_transcript_7429  | cysteine synthase A [EC:2.5.1.47]                                       | cysteine synthase                                     |
| K01738 | dazi_transcript_7974  | cysteine synthase A [EC:2.5.1.47]                                       | cysteine synthase                                     |
| K01738 | dazi_transcript_8377  | cysteine synthase A [EC:2.5.1.47]                                       | cysteine synthase                                     |
| K01738 | dazi_transcript_18573 | cysteine synthase A [EC:2.5.1.47]                                       | cysteine synthase                                     |
| K01738 | dazi_transcript_18904 | cysteine synthase A [EC:2.5.1.47]                                       | cysteine synthase                                     |
| K01755 | dazi_transcript_3727  | argininosuccinate lyase [EC:4.3.2.1]                                    | argininosuccinate lyase, chloroplastic                |
| K01755 | dazi_transcript_47110 | argininosuccinate lyase [EC:4.3.2.1]                                    | argininosuccinate lyase, chloroplastic                |
| K01755 | dazi_transcript_50240 | argininosuccinate lyase [EC:4.3.2.1]                                    | argininosuccinate lyase, chloroplastic                |
| K01810 | dazi_transcript_37633 | glucose-6-phosphate isomerase [EC:5.3.1.9]                              | glucose-6-phosphate isomerase 1, chloroplastic        |
| K01810 | dazi_transcript_45611 | glucose-6-phosphate isomerase [EC:5.3.1.9]                              | glucose-6-phosphate isomerase, cytosolic              |
| K01810 | dazi_transcript_47914 | glucose-6-phosphate isomerase [EC:5.3.1.9]                              | glucose-6-phosphate isomerase                         |
| K01810 | dazi_transcript_49496 | glucose-6-phosphate isomerase [EC:5.3.1.9]                              | glucose-6-phosphate isomerase                         |
| K01810 | dazi_transcript_57398 | glucose-6-phosphate isomerase [EC:5.3.1.9]                              | glucose-6-phosphate isomerase 1, chloroplastic        |
| K01810 | dazi_transcript_65464 | glucose-6-phosphate isomerase [EC:5.3.1.9]                              | glucose-6-phosphate isomerase                         |
| K01810 | dazi_transcript_66496 | glucose-6-phosphate isomerase [EC:5.3.1.9]                              | glucose-6-phosphate isomerase 1, chloroplastic        |
| K01810 | dazi_transcript_16598 | glucose-6-phosphate isomerase [EC:5.3.1.9]                              | hypothetical protein                                  |
| K01810 | dazi_transcript_17147 | glucose-6-phosphate isomerase [EC:5.3.1.9]                              | glucose-6-phosphate isomerase                         |
| K01810 | dazi_transcript_9401  | glucose-6-phosphate isomerase [EC:5.3.1.9]                              | glucose-6-phosphate isomerase                         |
| K01810 | dazi_transcript_2628  | glucose-6-phosphate isomerase [EC:5.3.1.9]                              | glucose-6-phosphate isomerase                         |
| K01810 | dazi_transcript_28872 | glucose-6-phosphate isomerase [EC:5.3.1.9]                              | hypothetical protein                                  |
| K01810 | dazi_transcript_31813 | glucose-6-phosphate isomerase [EC:5.3.1.9]                              | glucose-6-phosphate isomerase 1, chloroplastic        |
| K01834 | dazi_transcript_39416 | 2,3-bisphosphoglycerate-dependent phosphoglycerate mutase [EC:5.4.2.11] | phosphoglycerate mutase                               |
| K01834 | dazi_transcript_21328 | 2,3-bisphosphoglycerate-dependent phosphoglycerate mutase [EC:5.4.2.11] | POPTRDRAFT_1071686; hypothetical protein              |
| K01850 | dazi_transcript_38108 | chorismate mutase [EC:5.4.99.5]                                         | chorismate mutase 1, chloroplastic-like               |
| K01850 | dazi_transcript_54708 | chorismate mutase [EC:5.4.99.5]                                         | Chorismate mutase 1                                   |

|        |                       |                                                                                  |                                                                         |
|--------|-----------------------|----------------------------------------------------------------------------------|-------------------------------------------------------------------------|
| K01850 | dazi_transcript_68193 | chorismate mutase [EC:5.4.99.5]                                                  | chorismate mutase 3, chloroplastic                                      |
| K01850 | dazi_transcript_7223  | chorismate mutase [EC:5.4.99.5]                                                  | Chorismate mutase 1                                                     |
| K01850 | dazi_transcript_18766 | chorismate mutase [EC:5.4.99.5]                                                  | Chorismate mutase 1                                                     |
| K01850 | dazi_transcript_24174 | chorismate mutase [EC:5.4.99.5]                                                  | chorismate mutase 2                                                     |
| K01850 | dazi_transcript_34221 | chorismate mutase [EC:5.4.99.5]                                                  | chorismate mutase 1, chloroplastic-like                                 |
| K01899 | dazi_transcript_67258 | succinyl-CoA synthetase alpha subunit [EC:6.2.1.4 6.2.1.5]                       | probable succinyl-CoA ligase [ADP-forming] subunit alpha, mitochondrial |
| K01899 | dazi_transcript_6843  | succinyl-CoA synthetase alpha subunit [EC:6.2.1.4 6.2.1.5]                       | probable succinyl-CoA ligase [ADP-forming] subunit alpha, mitochondrial |
| K01899 | dazi_transcript_7248  | succinyl-CoA synthetase alpha subunit [EC:6.2.1.4 6.2.1.5]                       | succinyl-CoA ligase [ADP-forming] subunit alpha-2, mitochondrial        |
| K01899 | dazi_transcript_27266 | succinyl-CoA synthetase alpha subunit [EC:6.2.1.4 6.2.1.5]                       | succinyl-CoA ligase [ADP-forming] subunit alpha-2, mitochondrial        |
| K01900 | dazi_transcript_5409  | succinyl-CoA synthetase beta subunit [EC:6.2.1.4 6.2.1.5]                        | succinate--CoA ligase [ADP-forming] subunit beta, mitochondrial         |
| K01900 | dazi_transcript_65898 | succinyl-CoA synthetase beta subunit [EC:6.2.1.4 6.2.1.5]                        | succinate--CoA ligase [ADP-forming] subunit beta, mitochondrial         |
| K01900 | dazi_transcript_19539 | succinyl-CoA synthetase beta subunit [EC:6.2.1.4 6.2.1.5]                        | succinate--CoA ligase [ADP-forming] subunit beta, mitochondrial         |
| K05298 | dazi_transcript_10249 | glyceraldehyde-3-phosphate dehydrogenase (NADP+) (phosphorylating) [EC:1.2.1.13] | glyceraldehyde-3-phosphate dehydrogenase GAPA1, chloroplastic-like      |
| K05298 | dazi_transcript_39775 | glyceraldehyde-3-phosphate dehydrogenase (NADP+) (phosphorylating) [EC:1.2.1.13] | glyceraldehyde-3-phosphate dehydrogenase B, chloroplastic               |
| K05298 | dazi_transcript_40655 | glyceraldehyde-3-phosphate dehydrogenase (NADP+) (phosphorylating) [EC:1.2.1.13] | GAPDH; glyceraldehyde-3-phosphate dehydrogenase                         |
| K05298 | dazi_transcript_4309  | glyceraldehyde-3-phosphate dehydrogenase (NADP+) (phosphorylating) [EC:1.2.1.13] | glyceraldehyde-3-phosphate dehydrogenase B, chloroplastic               |
| K05298 | dazi_transcript_4854  | glyceraldehyde-3-phosphate dehydrogenase (NADP+) (phosphorylating) [EC:1.2.1.13] | glyceraldehyde-3-phosphate dehydrogenase A, chloroplastic-like          |
| K05298 | dazi_transcript_49473 | glyceraldehyde-3-phosphate dehydrogenase (NADP+) (phosphorylating) [EC:1.2.1.13] | GAPDH; glyceraldehyde-3-phosphate dehydrogenase                         |
| K05298 | dazi_transcript_4968  | glyceraldehyde-3-phosphate dehydrogenase (NADP+) (phosphorylating) [EC:1.2.1.13] | glyceraldehyde-3-phosphate dehydrogenase B, chloroplastic isoform X1    |
| K05298 | dazi_transcript_51230 | glyceraldehyde-3-phosphate dehydrogenase (NADP+) (phosphorylating) [EC:1.2.1.13] | glyceraldehyde-3-phosphate dehydrogenase B, chloroplastic               |
| K05298 | dazi_transcript_52415 | glyceraldehyde-3-phosphate dehydrogenase (NADP+) (phosphorylating) [EC:1.2.1.13] | glyceraldehyde-3-phosphate dehydrogenase B, chloroplastic isoform X1    |
| K05298 | dazi_transcript_5397  | glyceraldehyde-3-phosphate dehydrogenase (NADP+)                                 | GAPDH; glyceraldehyde-3-phosphate dehydrogenase                         |

|        |                       |                                                                                     |                                                                         |
|--------|-----------------------|-------------------------------------------------------------------------------------|-------------------------------------------------------------------------|
|        |                       | (phosphorylating) [EC:1.2.1.13]                                                     |                                                                         |
| K05298 | dazi_transcript_55610 | glyceraldehyde-3-phosphate dehydrogenase (NADP+)<br>(phosphorylating) [EC:1.2.1.13] | GAPDH; glyceraldehyde-3-phosphate dehydrogenase                         |
| K05298 | dazi_transcript_5891  | glyceraldehyde-3-phosphate dehydrogenase (NADP+)<br>(phosphorylating) [EC:1.2.1.13] | GAPDH; glyceraldehyde-3-phosphate dehydrogenase                         |
| K05298 | dazi_transcript_5895  | glyceraldehyde-3-phosphate dehydrogenase (NADP+)<br>(phosphorylating) [EC:1.2.1.13] | GAPDH; glyceraldehyde-3-phosphate dehydrogenase                         |
| K05298 | dazi_transcript_59067 | glyceraldehyde-3-phosphate dehydrogenase (NADP+)<br>(phosphorylating) [EC:1.2.1.13] | glyceraldehyde-3-phosphate dehydrogenase B,<br>chloroplastic            |
| K05298 | dazi_transcript_60273 | glyceraldehyde-3-phosphate dehydrogenase (NADP+)<br>(phosphorylating) [EC:1.2.1.13] | glyceraldehyde-3-phosphate dehydrogenase B,<br>chloroplastic            |
| K05298 | dazi_transcript_61261 | glyceraldehyde-3-phosphate dehydrogenase (NADP+)<br>(phosphorylating) [EC:1.2.1.13] | GAPDH; glyceraldehyde-3-phosphate dehydrogenase                         |
| K05298 | dazi_transcript_6149  | glyceraldehyde-3-phosphate dehydrogenase (NADP+)<br>(phosphorylating) [EC:1.2.1.13] | glyceraldehyde-3-phosphate dehydrogenase B,<br>chloroplastic            |
| K05298 | dazi_transcript_64770 | glyceraldehyde-3-phosphate dehydrogenase (NADP+)<br>(phosphorylating) [EC:1.2.1.13] | glyceraldehyde-3-phosphate dehydrogenase A,<br>chloroplastic-like       |
| K05298 | dazi_transcript_65314 | glyceraldehyde-3-phosphate dehydrogenase (NADP+)<br>(phosphorylating) [EC:1.2.1.13] | GAPDH; glyceraldehyde-3-phosphate dehydrogenase                         |
| K05298 | dazi_transcript_16285 | glyceraldehyde-3-phosphate dehydrogenase (NADP+)<br>(phosphorylating) [EC:1.2.1.13] | glyceraldehyde-3-phosphate dehydrogenase B,<br>chloroplastic            |
| K05298 | dazi_transcript_6871  | glyceraldehyde-3-phosphate dehydrogenase (NADP+)<br>(phosphorylating) [EC:1.2.1.13] | GAPDH; glyceraldehyde-3-phosphate dehydrogenase                         |
| K05298 | dazi_transcript_71195 | glyceraldehyde-3-phosphate dehydrogenase (NADP+)<br>(phosphorylating) [EC:1.2.1.13] | GAPDH; glyceraldehyde-3-phosphate dehydrogenase                         |
| K05298 | dazi_transcript_8159  | glyceraldehyde-3-phosphate dehydrogenase (NADP+)<br>(phosphorylating) [EC:1.2.1.13] | glyceraldehyde-3-phosphate dehydrogenase B,<br>chloroplastic            |
| K05298 | dazi_transcript_9638  | glyceraldehyde-3-phosphate dehydrogenase (NADP+)<br>(phosphorylating) [EC:1.2.1.13] | glyceraldehyde-3-phosphate dehydrogenase B,<br>chloroplastic isoform X1 |
| K05298 | dazi_transcript_19586 | glyceraldehyde-3-phosphate dehydrogenase (NADP+)<br>(phosphorylating) [EC:1.2.1.13] | GAPDH; glyceraldehyde-3-phosphate dehydrogenase                         |
| K05298 | dazi_transcript_20949 | glyceraldehyde-3-phosphate dehydrogenase (NADP+)<br>(phosphorylating) [EC:1.2.1.13] | GAPDH; glyceraldehyde-3-phosphate dehydrogenase                         |
| K05298 | dazi_transcript_22332 | glyceraldehyde-3-phosphate dehydrogenase (NADP+)<br>(phosphorylating) [EC:1.2.1.13] | hypothetical protein                                                    |
| K05298 | dazi_transcript_24936 | glyceraldehyde-3-phosphate dehydrogenase (NADP+)<br>(phosphorylating) [EC:1.2.1.13] | GAPDH; glyceraldehyde-3-phosphate dehydrogenase                         |
| K05298 | dazi_transcript_25063 | glyceraldehyde-3-phosphate dehydrogenase (NADP+)                                    | glyceraldehyde-3-phosphate dehydrogenase B,                             |



|        |                       |                                                                                                                        |                                                                                           |
|--------|-----------------------|------------------------------------------------------------------------------------------------------------------------|-------------------------------------------------------------------------------------------|
| K05298 | dazi_transcript_30698 | (phosphorylating) [EC:1.2.1.13]<br>glyceraldehyde-3-phosphate dehydrogenase (NADP+)<br>(phosphorylating) [EC:1.2.1.13] | chloroplastic<br>glyceraldehyde-3-phosphate dehydrogenase B,<br>chloroplastic             |
| K13034 | dazi_transcript_41591 | L-3-cyanoalanine synthase/cysteine synthase [EC:2.5.1.47 4.4.1.9]                                                      | bifunctional L-3-cyanoalanine synthase/cysteine synthase 1,<br>mitochondrial              |
| K13832 | dazi_transcript_34743 | 3-dehydroquinate dehydratase/shikimate dehydrogenase [EC:4.2.1.10 1.1.1.25]                                            | POPTRDRAFT_565769; dehydroquinate dehydratase<br>family protein                           |
| K13832 | dazi_transcript_3677  | 3-dehydroquinate dehydratase/shikimate dehydrogenase [EC:4.2.1.10 1.1.1.25]                                            | SDH1; bifunctional 3-dehydroquinate<br>dehydratase/shikimate dehydrogenase, chloroplastic |
| K13832 | dazi_transcript_40484 | 3-dehydroquinate dehydratase/shikimate dehydrogenase [EC:4.2.1.10 1.1.1.25]                                            | bifunctional 3-dehydroquinate dehydratase/shikimate<br>dehydrogenase, chloroplastic-like  |
| K13832 | dazi_transcript_44309 | 3-dehydroquinate dehydratase/shikimate dehydrogenase [EC:4.2.1.10 1.1.1.25]                                            | bifunctional 3-dehydroquinate dehydratase/shikimate<br>dehydrogenase, chloroplastic-like  |
| K13832 | dazi_transcript_47696 | 3-dehydroquinate dehydratase/shikimate dehydrogenase [EC:4.2.1.10 1.1.1.25]                                            | bifunctional 3-dehydroquinate dehydratase/shikimate<br>dehydrogenase, chloroplastic-like  |
| K13832 | dazi_transcript_50467 | 3-dehydroquinate dehydratase/shikimate dehydrogenase [EC:4.2.1.10 1.1.1.25]                                            | SDH2; bifunctional 3-dehydroquinate<br>dehydratase/shikimate dehydrogenase, chloroplastic |
| K13832 | dazi_transcript_51532 | 3-dehydroquinate dehydratase/shikimate dehydrogenase [EC:4.2.1.10 1.1.1.25]                                            | bifunctional 3-dehydroquinate dehydratase/shikimate<br>dehydrogenase, chloroplastic-like  |
| K13832 | dazi_transcript_51917 | 3-dehydroquinate dehydratase/shikimate dehydrogenase [EC:4.2.1.10 1.1.1.25]                                            | SDH2; bifunctional 3-dehydroquinate<br>dehydratase/shikimate dehydrogenase, chloroplastic |
| K13832 | dazi_transcript_58804 | 3-dehydroquinate dehydratase/shikimate dehydrogenase [EC:4.2.1.10 1.1.1.25]                                            | SDH1; bifunctional 3-dehydroquinate<br>dehydratase/shikimate dehydrogenase, chloroplastic |
| K13832 | dazi_transcript_60067 | 3-dehydroquinate dehydratase/shikimate dehydrogenase [EC:4.2.1.10 1.1.1.25]                                            | SDH2; bifunctional 3-dehydroquinate<br>dehydratase/shikimate dehydrogenase, chloroplastic |
| K13832 | dazi_transcript_67289 | 3-dehydroquinate dehydratase/shikimate dehydrogenase [EC:4.2.1.10 1.1.1.25]                                            | bifunctional 3-dehydroquinate dehydratase/shikimate<br>dehydrogenase, chloroplastic-like  |
| K13832 | dazi_transcript_68382 | 3-dehydroquinate dehydratase/shikimate dehydrogenase [EC:4.2.1.10 1.1.1.25]                                            | SDH1; bifunctional 3-dehydroquinate<br>dehydratase/shikimate dehydrogenase, chloroplastic |
| K13832 | dazi_transcript_18556 | 3-dehydroquinate dehydratase/shikimate dehydrogenase [EC:4.2.1.10 1.1.1.25]                                            | bifunctional 3-dehydroquinate dehydratase/shikimate<br>dehydrogenase, chloroplastic       |
| K13832 | dazi_transcript_19811 | 3-dehydroquinate dehydratase/shikimate dehydrogenase [EC:4.2.1.10 1.1.1.25]                                            | bifunctional 3-dehydroquinate dehydratase/shikimate<br>dehydrogenase, chloroplastic       |
| K13832 | dazi_transcript_24239 | 3-dehydroquinate dehydratase/shikimate dehydrogenase [EC:4.2.1.10 1.1.1.25]                                            | hypothetical protein                                                                      |
| K13832 | dazi_transcript_26429 | 3-dehydroquinate dehydratase/shikimate dehydrogenase [EC:4.2.1.10 1.1.1.25]                                            | SDH2; bifunctional 3-dehydroquinate<br>dehydratase/shikimate dehydrogenase, chloroplastic |
| K14272 | dazi_transcript_36298 | glutamate--glyoxylate aminotransferase [EC:2.6.1.4 2.6.1.2 2.6.1.44]                                                   | AlaT1                                                                                     |

|        |                       |                                                                      |                                                            |
|--------|-----------------------|----------------------------------------------------------------------|------------------------------------------------------------|
| K14272 | dazi_transcript_47846 | glutamate--glyoxylate aminotransferase [EC:2.6.1.4 2.6.1.2 2.6.1.44] | AlaT1                                                      |
| K14272 | dazi_transcript_48032 | glutamate--glyoxylate aminotransferase [EC:2.6.1.4 2.6.1.2 2.6.1.44] | glutamate--glyoxylate aminotransferase 2                   |
| K14272 | dazi_transcript_49143 | glutamate--glyoxylate aminotransferase [EC:2.6.1.4 2.6.1.2 2.6.1.44] | AlaT1                                                      |
| K14272 | dazi_transcript_53078 | glutamate--glyoxylate aminotransferase [EC:2.6.1.4 2.6.1.2 2.6.1.44] | AlaT1                                                      |
| K14272 | dazi_transcript_66290 | glutamate--glyoxylate aminotransferase [EC:2.6.1.4 2.6.1.2 2.6.1.44] | glutamate--glyoxylate aminotransferase 2                   |
| K14272 | dazi_transcript_66540 | glutamate--glyoxylate aminotransferase [EC:2.6.1.4 2.6.1.2 2.6.1.44] | glutamate--glyoxylate aminotransferase 2                   |
| K14272 | dazi_transcript_16741 | glutamate--glyoxylate aminotransferase [EC:2.6.1.4 2.6.1.2 2.6.1.44] | AlaT1                                                      |
| K14272 | dazi_transcript_17048 | glutamate--glyoxylate aminotransferase [EC:2.6.1.4 2.6.1.2 2.6.1.44] | AlaT1                                                      |
| K14272 | dazi_transcript_2866  | glutamate--glyoxylate aminotransferase [EC:2.6.1.4 2.6.1.2 2.6.1.44] | AlaT1                                                      |
| K14272 | dazi_transcript_31811 | glutamate--glyoxylate aminotransferase [EC:2.6.1.4 2.6.1.2 2.6.1.44] | AlaT1                                                      |
| K14454 | dazi_transcript_45097 | aspartate aminotransferase, cytoplasmic [EC:2.6.1.1]                 | Aspartate aminotransferase 3                               |
| K14454 | dazi_transcript_5023  | aspartate aminotransferase, cytoplasmic [EC:2.6.1.1]                 | Aspartate aminotransferase 3                               |
| K14454 | dazi_transcript_5253  | aspartate aminotransferase, cytoplasmic [EC:2.6.1.1]                 | Aspartate aminotransferase 3                               |
| K14454 | dazi_transcript_71497 | aspartate aminotransferase, cytoplasmic [EC:2.6.1.1]                 | Aspartate aminotransferase 3                               |
| K14455 | dazi_transcript_4843  | aspartate aminotransferase, mitochondrial [EC:2.6.1.1]               | aspartate aminotransferase, mitochondrial                  |
| K14455 | dazi_transcript_5065  | aspartate aminotransferase, mitochondrial [EC:2.6.1.1]               | aspartate aminotransferase, mitochondrial                  |
| K14455 | dazi_transcript_70000 | aspartate aminotransferase, mitochondrial [EC:2.6.1.1]               | aspartate aminotransferase, mitochondrial                  |
| K14455 | dazi_transcript_24333 | aspartate aminotransferase, mitochondrial [EC:2.6.1.1]               | aspartate aminotransferase, mitochondrial                  |
| K14455 | dazi_transcript_29900 | aspartate aminotransferase, mitochondrial [EC:2.6.1.1]               | hypothetical protein                                       |
| K14677 | dazi_transcript_41123 | aminoacylase [EC:3.5.1.14]                                           | aminoacylase-1                                             |
| K14677 | dazi_transcript_4598  | aminoacylase [EC:3.5.1.14]                                           | aminoacylase-1                                             |
| K14677 | dazi_transcript_66223 | aminoacylase [EC:3.5.1.14]                                           | hypothetical protein                                       |
| K14677 | dazi_transcript_29192 | aminoacylase [EC:3.5.1.14]                                           | aminoacylase-1-like                                        |
| K14682 | dazi_transcript_62808 | amino-acid N-acetyltransferase [EC:2.3.1.1]                          | probable amino-acid acetyltransferase NAGS1, chloroplastic |
| K15227 | dazi_transcript_13708 | arogenate dehydrogenase (NADP+), plant [EC:1.3.1.78]                 | arogenate dehydrogenase 2, chloroplastic-like              |
| K15227 | dazi_transcript_5364  | arogenate dehydrogenase (NADP+), plant [EC:1.3.1.78]                 | arogenate dehydrogenase 2, chloroplastic-like              |
| K15227 | dazi_transcript_55478 | arogenate dehydrogenase (NADP+), plant [EC:1.3.1.78]                 | arogenate dehydrogenase 2, chloroplastic                   |
| K15227 | dazi_transcript_58499 | arogenate dehydrogenase (NADP+), plant [EC:1.3.1.78]                 | arogenate dehydrogenase 2, chloroplastic-like              |
| K15227 | dazi_transcript_6446  | arogenate dehydrogenase (NADP+), plant [EC:1.3.1.78]                 | arogenate dehydrogenase 2, chloroplastic-like              |
| K15227 | dazi_transcript_71024 | arogenate dehydrogenase (NADP+), plant [EC:1.3.1.78]                 | arogenate dehydrogenase 2, chloroplastic-like              |
| K15227 | dazi_transcript_17080 | arogenate dehydrogenase (NADP+), plant [EC:1.3.1.78]                 | arogenate dehydrogenase 2, chloroplastic-like              |
| K15227 | dazi_transcript_23420 | arogenate dehydrogenase (NADP+), plant [EC:1.3.1.78]                 | arogenate dehydrogenase 1, chloroplastic                   |
| K15227 | dazi_transcript_29990 | arogenate dehydrogenase (NADP+), plant [EC:1.3.1.78]                 | arogenate dehydrogenase 2, chloroplastic-like              |

|        |                       |                                                                           |                                                                      |
|--------|-----------------------|---------------------------------------------------------------------------|----------------------------------------------------------------------|
| K15633 | dazi_transcript_35804 | 2,3-bisphosphoglycerate-independent phosphoglycerate mutase [EC:5.4.2.12] | putative 2,3-bisphosphoglycerate-independent phosphoglycerate mutase |
| K15633 | dazi_transcript_38808 | 2,3-bisphosphoglycerate-independent phosphoglycerate mutase [EC:5.4.2.12] | 2,3-bisphosphoglycerate-independent phosphoglycerate mutase          |
| K15633 | dazi_transcript_46131 | 2,3-bisphosphoglycerate-independent phosphoglycerate mutase [EC:5.4.2.12] | 2,3-bisphosphoglycerate-independent phosphoglycerate mutase          |
| K15633 | dazi_transcript_57902 | 2,3-bisphosphoglycerate-independent phosphoglycerate mutase [EC:5.4.2.12] | 2,3-bisphosphoglycerate-independent phosphoglycerate mutase          |
| K15633 | dazi_transcript_20006 | 2,3-bisphosphoglycerate-independent phosphoglycerate mutase [EC:5.4.2.12] | 2,3-bisphosphoglycerate-independent phosphoglycerate mutase          |
| K15633 | dazi_transcript_21515 | 2,3-bisphosphoglycerate-independent phosphoglycerate mutase [EC:5.4.2.12] | 2,3-bisphosphoglycerate-independent phosphoglycerate mutase          |
| K15633 | dazi_transcript_2314  | 2,3-bisphosphoglycerate-independent phosphoglycerate mutase [EC:5.4.2.12] | 2,3-bisphosphoglycerate-independent phosphoglycerate mutase          |
| K15633 | dazi_transcript_2485  | 2,3-bisphosphoglycerate-independent phosphoglycerate mutase [EC:5.4.2.12] | 2,3-bisphosphoglycerate-independent phosphoglycerate mutase          |
| K15633 | dazi_transcript_26314 | 2,3-bisphosphoglycerate-independent phosphoglycerate mutase [EC:5.4.2.12] | 2,3-bisphosphoglycerate-independent phosphoglycerate mutase          |
| K15633 | dazi_transcript_2796  | 2,3-bisphosphoglycerate-independent phosphoglycerate mutase [EC:5.4.2.12] | 2,3-bisphosphoglycerate-independent phosphoglycerate mutase          |
| K15633 | dazi_transcript_2876  | 2,3-bisphosphoglycerate-independent phosphoglycerate mutase [EC:5.4.2.12] | 2,3-bisphosphoglycerate-independent phosphoglycerate mutase          |
| K15634 | dazi_transcript_4758  | probable phosphoglycerate mutase [EC:5.4.2.12]                            | probable 2-carboxy-D-arabinitol-1-phosphatase                        |
| K15634 | dazi_transcript_59202 | probable phosphoglycerate mutase [EC:5.4.2.12]                            | phosphoglycerate mutase-like protein 4                               |
| K15634 | dazi_transcript_59739 | probable phosphoglycerate mutase [EC:5.4.2.12]                            | phosphoglycerate mutase-like protein 4                               |
| K15634 | dazi_transcript_65185 | probable phosphoglycerate mutase [EC:5.4.2.12]                            | phosphoglycerate mutase-like protein 4                               |
| K15634 | dazi_transcript_9611  | probable phosphoglycerate mutase [EC:5.4.2.12]                            | phosphoglycerate mutase-like protein 4                               |

Table S5 Details of *AabHLH* gene family in *A. arguta* cv. Qinziyu.

| Name           | Transcript ID         | Protein ID                        | Protein length/bp | Nr annotation                                                |
|----------------|-----------------------|-----------------------------------|-------------------|--------------------------------------------------------------|
| <i>AabHLH1</i> | dazi_transcript_65811 | dazi_transcript_65811:224-589(+)  | 122               | transcription factor BHLH036, partial [Vaccinium corymbosum] |
| <i>AabHLH2</i> | dazi_transcript_800   | dazi_transcript_800:659-2380(+)   | 574               | transcription factor BHLH017, partial [Vaccinium corymbosum] |
| <i>AabHLH3</i> | dazi_transcript_65208 | dazi_transcript_65208:839-2560(+) | 574               | transcription factor BHLH017, partial [Vaccinium corymbosum] |
| <i>AabHLH4</i> | dazi_transcript_32207 | dazi_transcript_32207:721-2262(+) | 514               | transcription factor BHLH017, partial [Vaccinium corymbosum] |

|                 |                       |                                    |     |                                                                              |
|-----------------|-----------------------|------------------------------------|-----|------------------------------------------------------------------------------|
| <i>AabHLH5</i>  | dazi_transcript_25170 | dazi_transcript_25170:754-2457(+)  | 568 | transcription factor BHLH017, partial [ <i>Vaccinium corymbosum</i> ]        |
| <i>AabHLH6</i>  | dazi_transcript_26462 | dazi_transcript_26462:718-2433(+)  | 572 | transcription factor BHLH017, partial [ <i>Vaccinium corymbosum</i> ]        |
| <i>AabHLH7</i>  | dazi_transcript_27074 | dazi_transcript_27074:30-848(+)    | 273 | transcription factor BHLH032, partial [ <i>Vaccinium corymbosum</i> ]        |
| <i>AabHLH8</i>  | dazi_transcript_66315 | dazi_transcript_66315:415-939(+)   | 175 | transcription factor BHLH032, partial [ <i>Vaccinium corymbosum</i> ]        |
| <i>AabHLH9</i>  | dazi_transcript_54058 | dazi_transcript_54058:143-1009(+)  | 289 | transcription factor BHLH032, partial [ <i>Vaccinium corymbosum</i> ]        |
| <i>AabHLH10</i> | dazi_transcript_36784 | dazi_transcript_36784:162-1031(+)  | 290 | transcription factor BHLH032, partial [ <i>Vaccinium corymbosum</i> ]        |
| <i>AabHLH11</i> | dazi_transcript_28857 | dazi_transcript_28857:110-472(+)   | 121 | transcription factor BHLH056, partial [ <i>Vaccinium corymbosum</i> ]        |
| <i>AabHLH12</i> | dazi_transcript_33157 | dazi_transcript_33157:134-1117(+)  | 328 | transcription factor BHLH056, partial [ <i>Vaccinium corymbosum</i> ]        |
| <i>AabHLH13</i> | dazi_transcript_71260 | dazi_transcript_71260:699-1649(+)  | 317 | PREDICTED: transcription factor bHLH30-like [ <i>Gossypium arboreum</i> ]    |
| <i>AabHLH14</i> | dazi_transcript_70053 | dazi_transcript_70053:564-1523(+)  | 320 | PREDICTED: transcription factor bHLH30-like [ <i>Gossypium arboreum</i> ]    |
| <i>AabHLH15</i> | dazi_transcript_50917 | dazi_transcript_50917:612-2171(+)  | 520 | bHLH5 protein [ <i>Actinidia chinensis</i> ]                                 |
| <i>AabHLH16</i> | dazi_transcript_45520 | dazi_transcript_45520:279-1169(+)  | 297 | transcription factor bHLH30 [ <i>Durio zibethinus</i> ]                      |
| <i>AabHLH17</i> | dazi_transcript_42290 | dazi_transcript_42290:272-1186(+)  | 305 | HLH domain-containing protein [ <i>Cephalotus follicularis</i> ]             |
| <i>AabHLH18</i> | dazi_transcript_60046 | dazi_transcript_60046:20-811(+)    | 264 | PREDICTED: transcription factor bHLH51-like [ <i>Lupinus angustifolius</i> ] |
| <i>AabHLH19</i> | dazi_transcript_48144 | dazi_transcript_48144:126-1085(+)  | 320 | transcription factor BHLH056, partial [ <i>Vaccinium corymbosum</i> ]        |
| <i>AabHLH20</i> | dazi_transcript_17314 | dazi_transcript_17314:86-817(+)    | 244 | PREDICTED: transcription factor bHLH51-like [ <i>Lupinus angustifolius</i> ] |
| <i>AabHLH21</i> | dazi_transcript_32105 | dazi_transcript_32105:1235-1756(+) | 174 | PREDICTED: transcription factor bHLH130 isoform X2 [ <i>Vitis vinifera</i> ] |
| <i>AabHLH22</i> | dazi_transcript_34399 | dazi_transcript_34399:1109-1723(+) | 205 | PREDICTED: transcription factor bHLH130 isoform X2 [ <i>Vitis vinifera</i> ] |
| <i>AabHLH23</i> | dazi_transcript_30929 | dazi_transcript_30929:117-887(+)   | 257 | transcription factor BHLH047, partial [ <i>Vaccinium corymbosum</i> ]        |
| <i>AabHLH24</i> | dazi_transcript_59812 | dazi_transcript_59812:415-1092(+)  | 226 | PREDICTED: transcription factor bHLH130 isoform X2 [ <i>Vitis vinifera</i> ] |
| <i>AabHLH25</i> | dazi_transcript_56358 | dazi_transcript_56358:471-1247(+)  | 259 | transcription factor BHLH031, partial [ <i>Vaccinium corymbosum</i> ]        |
| <i>AabHLH26</i> | dazi_transcript_19282 | dazi_transcript_19282:83-982(+)    | 300 | PREDICTED: transcription factor bHLH93 [ <i>Vitis vinifera</i> ]             |
| <i>AabHLH27</i> | dazi_transcript_5190  | dazi_transcript_5190:86-1435(+)    | 450 | PREDICTED: transcription factor bHLH66-like [ <i>Populus euphratica</i> ]    |
| <i>AabHLH28</i> | dazi_transcript_35689 | dazi_transcript_35689:1173-1595(+) | 141 | PREDICTED: transcription factor bHLH130-like [ <i>Populus euphratica</i> ]   |
| <i>AabHLH29</i> | dazi_transcript_2212  | dazi_transcript_2212:707-2005(+)   | 433 | PREDICTED: transcription factor bHLH130 isoform X2 [ <i>Vitis vinifera</i> ] |
| <i>AabHLH30</i> | dazi_transcript_22300 | dazi_transcript_22300:484-1776(+)  | 431 | PREDICTED: transcription factor bHLH130 isoform X2 [ <i>Vitis vinifera</i> ] |
| <i>AabHLH31</i> | dazi_transcript_47866 | dazi_transcript_47866:379-1170(+)  | 264 | transcription factor BHLH031, partial [ <i>Vaccinium corymbosum</i> ]        |
| <i>AabHLH32</i> | dazi_transcript_4490  | dazi_transcript_4490:164-1513(+)   | 450 | PREDICTED: transcription factor bHLH66 [ <i>Ricinus communis</i> ]           |
| <i>AabHLH33</i> | dazi_transcript_4911  | dazi_transcript_4911:86-1435(+)    | 450 | PREDICTED: transcription factor bHLH66 [ <i>Ricinus communis</i> ]           |
| <i>AabHLH34</i> | dazi_transcript_39029 | dazi_transcript_39029:128-820(+)   | 231 | bHLH3 protein [ <i>Salvia miltiorrhiza</i> ]                                 |
| <i>AabHLH35</i> | dazi_transcript_38800 | dazi_transcript_38800:55-1005(+)   | 317 | PREDICTED: transcription factor bHLH93 isoform X1 [ <i>Vitis vinifera</i> ]  |
| <i>AabHLH36</i> | dazi_transcript_56908 | dazi_transcript_56908:124-987(+)   | 288 | PREDICTED: transcription factor bHLH94-like [ <i>Nelumbo nucifera</i> ]      |
| <i>AabHLH37</i> | dazi_transcript_8770  | dazi_transcript_8770:135-998(+)    | 288 | Transcription factor bHLH94 [ <i>Capsicum chinense</i> ]                     |
| <i>AabHLH38</i> | dazi_transcript_18305 | dazi_transcript_18305:119-982(+)   | 288 | PREDICTED: transcription factor bHLH94-like [ <i>Nelumbo nucifera</i> ]      |

|                 |                       |                                    |     |                                                                              |
|-----------------|-----------------------|------------------------------------|-----|------------------------------------------------------------------------------|
| <i>AabHLH39</i> | dazi_transcript_65784 | dazi_transcript_65784:857-1270(+)  | 138 | transcription factor bHLH30 [Durio zibethinus]                               |
| <i>AabHLH40</i> | dazi_transcript_33433 | dazi_transcript_33433:44-484(+)    | 147 | transcription factor BHLH014, partial [Vaccinium corymbosum]                 |
| <i>AabHLH41</i> | dazi_transcript_56087 | dazi_transcript_56087:133-981(+)   | 283 | transcription factor BHLH052, partial [Vaccinium corymbosum]                 |
| <i>AabHLH42</i> | dazi_transcript_38985 | dazi_transcript_38985:321-1169(+)  | 283 | transcription factor BHLH052, partial [Vaccinium corymbosum]                 |
| <i>AabHLH43</i> | dazi_transcript_40401 | dazi_transcript_40401:230-1111(+)  | 294 | PREDICTED: transcription factor bHLH96 [Nelumbo nucifera]                    |
| <i>AabHLH44</i> | dazi_transcript_42846 | dazi_transcript_42846:98-979(+)    | 294 | PREDICTED: transcription factor bHLH96 [Nelumbo nucifera]                    |
| <i>AabHLH45</i> | dazi_transcript_57194 | dazi_transcript_57194:99-650(+)    | 184 | transcription factor bHLH162 isoform X2 [Quercus suber]                      |
| <i>AabHLH46</i> | dazi_transcript_28786 | dazi_transcript_28786:139-987(+)   | 283 | PREDICTED: transcription factor bHLH79-like isoform X1 [Juglans regia]       |
| <i>AabHLH47</i> | dazi_transcript_29731 | dazi_transcript_29731:218-925(+)   | 236 | PREDICTED: transcription factor bHLH79 isoform X3 [Ricinus communis]         |
| <i>AabHLH48</i> | dazi_transcript_49593 | dazi_transcript_49593:147-950(+)   | 268 | transcription factor bHLH121 isoform X3 [Herrania umbratica]                 |
| <i>AabHLH49</i> | dazi_transcript_28068 | dazi_transcript_28068:597-1841(+)  | 415 | transcription factor BHLH003, partial [Vaccinium corymbosum]                 |
| <i>AabHLH50</i> | dazi_transcript_26484 | dazi_transcript_26484:538-1782(+)  | 415 | transcription factor BHLH003, partial [Vaccinium corymbosum]                 |
| <i>AabHLH51</i> | dazi_transcript_27437 | dazi_transcript_27437:63-497(+)    | 145 | PREDICTED: transcription factor bHLH140-like [Juglans regia]                 |
| <i>AabHLH52</i> | dazi_transcript_41213 | dazi_transcript_41213:201-1070(+)  | 290 | transcription factor BHLH053, partial [Vaccinium corymbosum]                 |
| <i>AabHLH53</i> | dazi_transcript_61839 | dazi_transcript_61839:204-1070(+)  | 289 | transcription factor BHLH053, partial [Vaccinium corymbosum]                 |
| <i>AabHLH54</i> | dazi_transcript_6831  | dazi_transcript_6831:104-1135(+)   | 344 | transcription factor bHLH128-like isoform X1 [Olea europaea var. sylvestris] |
| <i>AabHLH55</i> | dazi_transcript_59331 | dazi_transcript_59331:77-823(+)    | 249 | transcription factor bHLH30 [Morus notabilis]                                |
| <i>AabHLH56</i> | dazi_transcript_22766 | dazi_transcript_22766:155-532(+)   | 126 | transcription factor bHLH71-like [Olea europaea var. sylvestris]             |
| <i>AabHLH57</i> | dazi_transcript_16392 | dazi_transcript_16392:157-825(+)   | 223 | transcription factor BHLH014, partial [Vaccinium corymbosum]                 |
| <i>AabHLH58</i> | dazi_transcript_29297 | dazi_transcript_29297:674-1792(+)  | 373 | transcription factor bHLH74 isoform X2 [Prunus persica]                      |
| <i>AabHLH59</i> | dazi_transcript_40764 | dazi_transcript_40764:365-1375(+)  | 337 | transcription factor bHLH48-like [Manihot esculenta]                         |
| <i>AabHLH60</i> | dazi_transcript_38896 | dazi_transcript_38896:765-1895(+)  | 377 | transcription factor BHLH057, partial [Vaccinium corymbosum]                 |
| <i>AabHLH61</i> | dazi_transcript_4216  | dazi_transcript_4216:348-1391(+)   | 348 | transcription factor bHLH48-like [Manihot esculenta]                         |
| <i>AabHLH62</i> | dazi_transcript_7904  | dazi_transcript_7904:169-540(+)    | 124 | PREDICTED: transcription factor bHLH71-like [Juglans regia]                  |
| <i>AabHLH63</i> | dazi_transcript_55505 | dazi_transcript_55505:549-1562(+)  | 338 | PREDICTED: transcription factor bHLH48 [Vitis vinifera]                      |
| <i>AabHLH64</i> | dazi_transcript_48284 | dazi_transcript_48284:1111-2124(+) | 338 | PREDICTED: transcription factor bHLH48 [Vitis vinifera]                      |

---

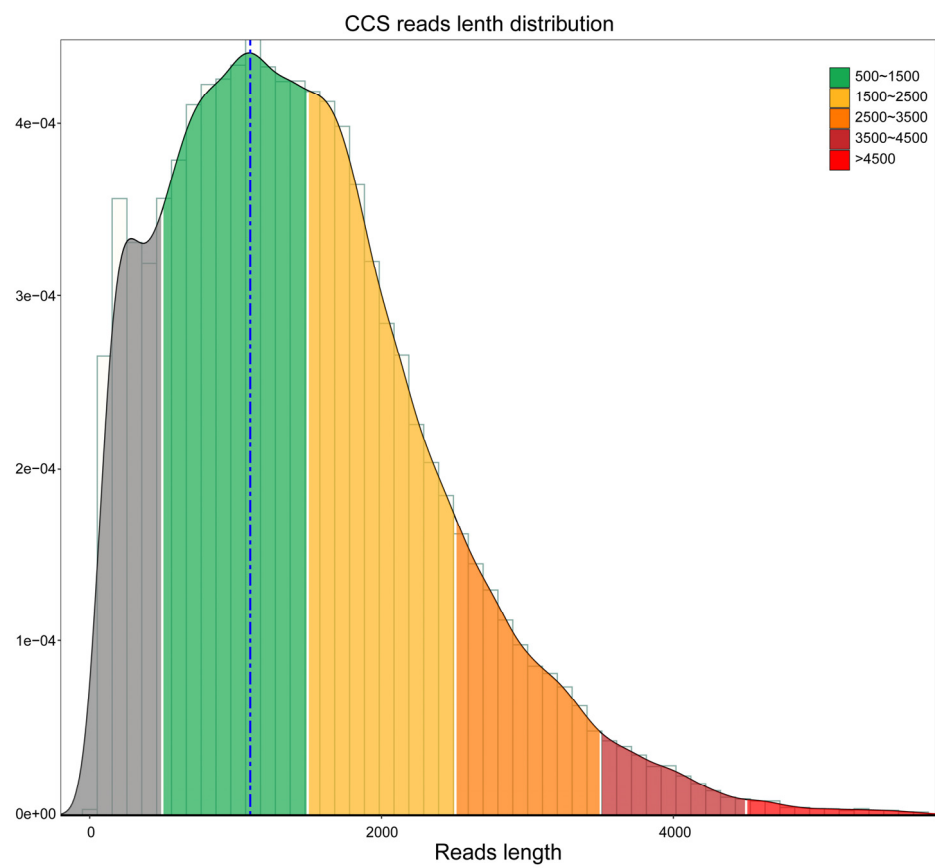

Figure S1. Length distributions of circular consensus (CCS) reads.

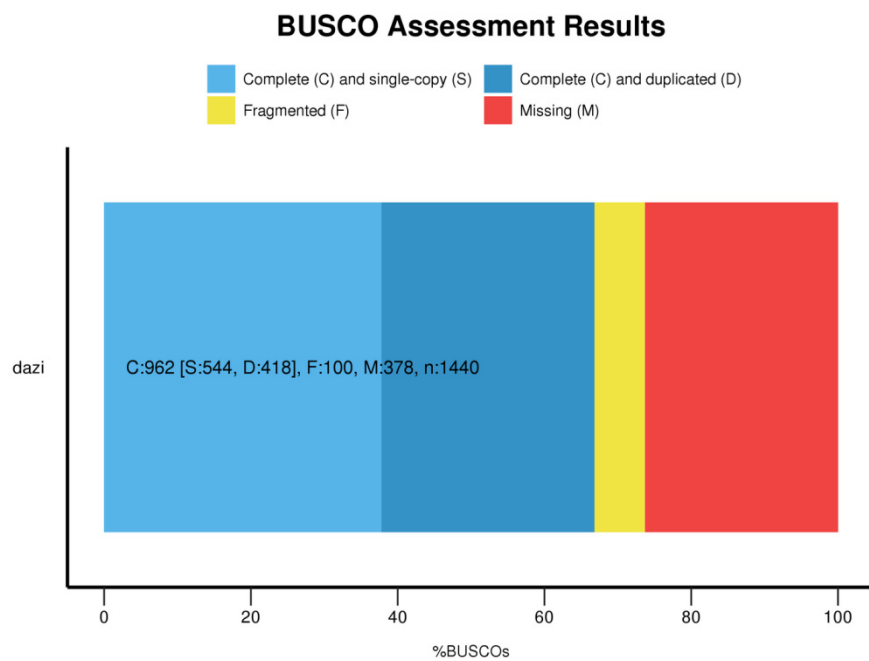

Figure S2. Statistics of BUSCO integrity assessment.

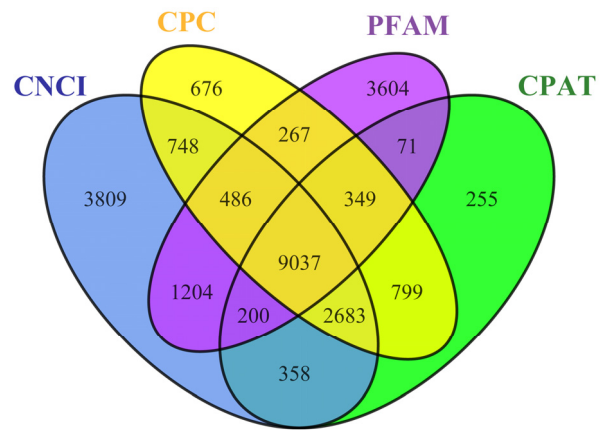

Figure S3. Venn diagram of long non-coding RNAs (lncRNAs). CPC: coding potential calculator; CNCI: coding-noncoding index; CPAT: coding potential assessment tool; Pfam: protein families.



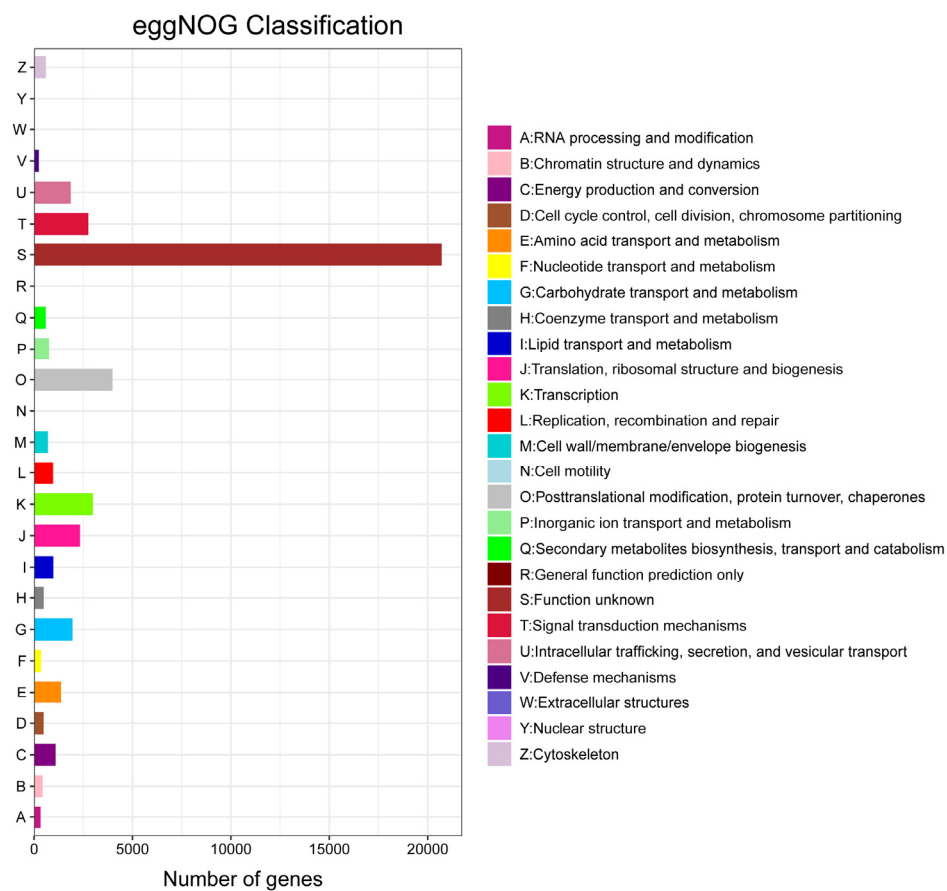

Figure S4. eggNOG classification of the assembled full-length transcripts in *A. arguta* cv. Qinziyu.
